# Supplementary material
Source: PubMed Central journal article supplement (PMC3439217)
Supplement: NIHMS403825-supplement-Supplementary_Information.pdf [file NIHMS403825-supplement-Supplementary_Information.pdf]

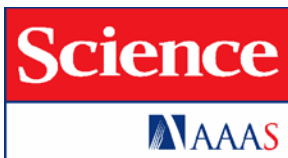

## Supplementary Materials for

### **Enantioselective C-H Crotylation of Primary Alcohols via Hydrohydroxyalkylation of Butadiene**

Jason R. Zbieg, Eiji Yamaguchi, Emma L. McInturff, Michael J. Krische\*

\*To whom correspondence should be addressed. E-mail: mkrische@mail.utexas.edu

Published 22 March 2012 on *Science Express*  
DOI: 10.1126/science.1219274

**This PDF file includes:**

Materials and Methods  
Fig. S1  
Tables S1 to S4  
References (34–41)

## Materials and Methods

### General Information

All reactions were run under an atmosphere of argon. Tetrahydrofuran (THF) and toluene were obtained from Pure-Solv MD-5 Solvent Purification System (Innovative Technology). Anhydrous solvents were transferred by oven-dried syringe. Sealed tubes (13×100 mm<sup>2</sup>) were purchased from Fisher Scientific (catalog number 14-959-35C) and were dried in an oven overnight and cooled under a stream of argon prior to use. RuH<sub>2</sub>(CO)(PPh<sub>3</sub>)<sub>3</sub> were prepared according to literature procedure (34). All ligands were used as received from Strem Chemicals Inc. Alcohols and aldehydes were purified by distillation or recrystallization immediately prior to use. Preparative column chromatography employing silica gel was performed according to the method of Still (35). Analytical thin-layer chromatography (TLC) was carried out using 0.25 mm commercial silica gel plates (Dynamic Adsorbents F<sub>254</sub>). Visualization was accomplished with UV light followed by dipping in a *p*-anisaldehyde solution and heating. Purification of reaction products was carried out by flash column chromatography using Silicycle silica gel (40-63 μm).

### Spectroscopy and Spectrometry

Infrared spectra were recorded on a Thermo Nicolet 380 spectrometer. Low-resolution mass spectra (LRMS) were obtained on a Karatos MS9 and are reported as *m/z* (relative intensity). Accurate masses are reported for the molecular ion (M+H, M or M-H) or a suitable fragment ion. <sup>1</sup>H NMR spectra were recorded on a Varian Gemini (400 MHz) spectrometer at ambient temperature unless otherwise noted. Chemical shifts are reported in delta (δ) units, parts per million (ppm) downfield from trimethylsilane or ppm relative to the center of the singlet at 7.26 ppm for deuteriochloroform. Data are reported as: multiplicity (s = singlet, d = doublet, t = triplet, q = quartet, m = multiplet), integration and coupling constant(s) in Hz. <sup>13</sup>C NMR spectra were recorded on a Varian Gemini (100 MHz) spectrometer and were routinely run with broadband decoupling. Chemical shifts are reported in ppm from tetramethylsilane, with the residual solvent resonance employed as the internal standard (CDCl<sub>3</sub> at 77.0 ppm).

## Experimental Details and Characterization Data

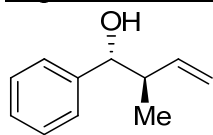

**(1R,2R)-2-methyl-1-phenylbut-3-en-1-ol (3a)**

**From Alcohol Oxidation Level:** To a resealable pressure tube (13 x 100 mm) equipped with a magnetic stir bar was added RuH<sub>2</sub>(CO)(PPh<sub>3</sub>)<sub>3</sub> (13.8 mg, 0.015 mmol, 5 mol%), dppf (8.3 mg, 0.015 mmol, 5 mol%), (*R*)-phosphoric acid **A<sub>9</sub>** (15.1 mg, 0.03 mmol, 10 mol%). The tube was sealed with a rubber septum and purged with nitrogen. Alcohol **1a** (0.031 mL, 0.30 mmol, 100 mol%) and tetrahydrofuran (0.15 mL, 2.0 M concentration with respect to alcohol) were added and the solution was cooled to -78°C. Butadiene (0.10 mL, 1.20 mmol, 400 mol%) was quickly added and the rubber septum was quickly replaced with a screw cap. The mixture was heated at 95°C (oil bath temperature) for 48 hrs, at which point the reaction mixture was allowed to cool to ambient temperature. The reaction mixture was concentrated *in vacuo* and purified by flash column chromatography (SiO<sub>2</sub>; 0-10% EtOAc/hexanes) to furnish the title compound (41.8 mg, 0.26 mmol, *anti:syn* = 8:1, 95:5 er) as a colorless oil in 86% yield.

**From Aldehyde Oxidation Level:** To a resealable pressure tube (13 x 100 mm) equipped with a magnetic stir bar was added RuH<sub>2</sub>(CO)(PPh<sub>3</sub>)<sub>3</sub> (13.8 mg, 0.015 mmol, 5 mol%), dppf (8.3 mg, 0.015 mmol, 5 mol%), (*R*)-phosphoric acid **A<sub>9</sub>** (15.1 mg, 0.03 mmol, 10 mol%). The tube was sealed with a rubber septum and purged with nitrogen. Aldehyde **2a** (0.031 mL, 0.30 mmol, 100 mol%), tetrahydrofuran (0.15 mL, 2.0 M concentration with respect to alcohol) and 1,4-butanediol (0.053 mL, 0.60 mmol, 200 mol%) were added and the solution was cooled to -78°C. Butadiene (0.10 mL, 1.20 mmol, 400 mol%) was quickly added and the rubber septum was quickly replaced with a screw cap. The mixture was heated at 95°C (oil bath temperature) for 48 hrs, at which point the reaction mixture was allowed to cool to ambient temperature. The reaction mixture was concentrated *in vacuo* and purified by flash column chromatography (SiO<sub>2</sub>; 0-10% EtOAc/hexanes) to furnish the title compound (36.2 mg, 0.22 mmol, *anti:syn* = 8:1, 94:6 er) as a colorless oil in 74% yield.

**<sup>1</sup>H NMR** (400 MHz, CDCl<sub>3</sub>): δ 7.26-7.38 (m, 5H), 5.86-5.76 (m, 1H), 5.24-5.17 (m, 2H), 4.35 (d, J = 8.0 Hz, 1H), 2.52-2.45 (m, 1H), 2.07 (br s, 1H), 0.87 (d, J = 6.8 Hz, 3H)

**<sup>13</sup>C NMR** (100 MHz, CDCl<sub>3</sub>): δ 142.6, 140.9, 128.5, 127.9, 127.1, 117.1, 78.1, 46.6, 16.8.

**LRMS** (CI+) *m/z* 145 [M-OH]<sup>+</sup>

[α]<sub>D</sub><sup>25</sup> = +51 (c = 1.0, CH<sub>2</sub>Cl<sub>2</sub>).

**FTIR** (neat): 3411, 3064, 3029, 2964, 2927, 2356, 1940, 1638, 1493, 1453, 1416, 1372, 1261, 1195, 1075, 1018, 912, 800, 759, 700, 680 cm<sup>-1</sup>.

**GC:** Cyclosil-B: Initial temperature: 50 °C (5 min hold); 50-100 °C, rate: 0.5 °C/min (20 min hold); 100-135 °C, rate: 0.5 °C/min) t<sub>major</sub> = 128.5 min, t<sub>minor</sub> = 129.5 min.

The spectroscopic properties of this compound were consistent with the data available in the literature (36).

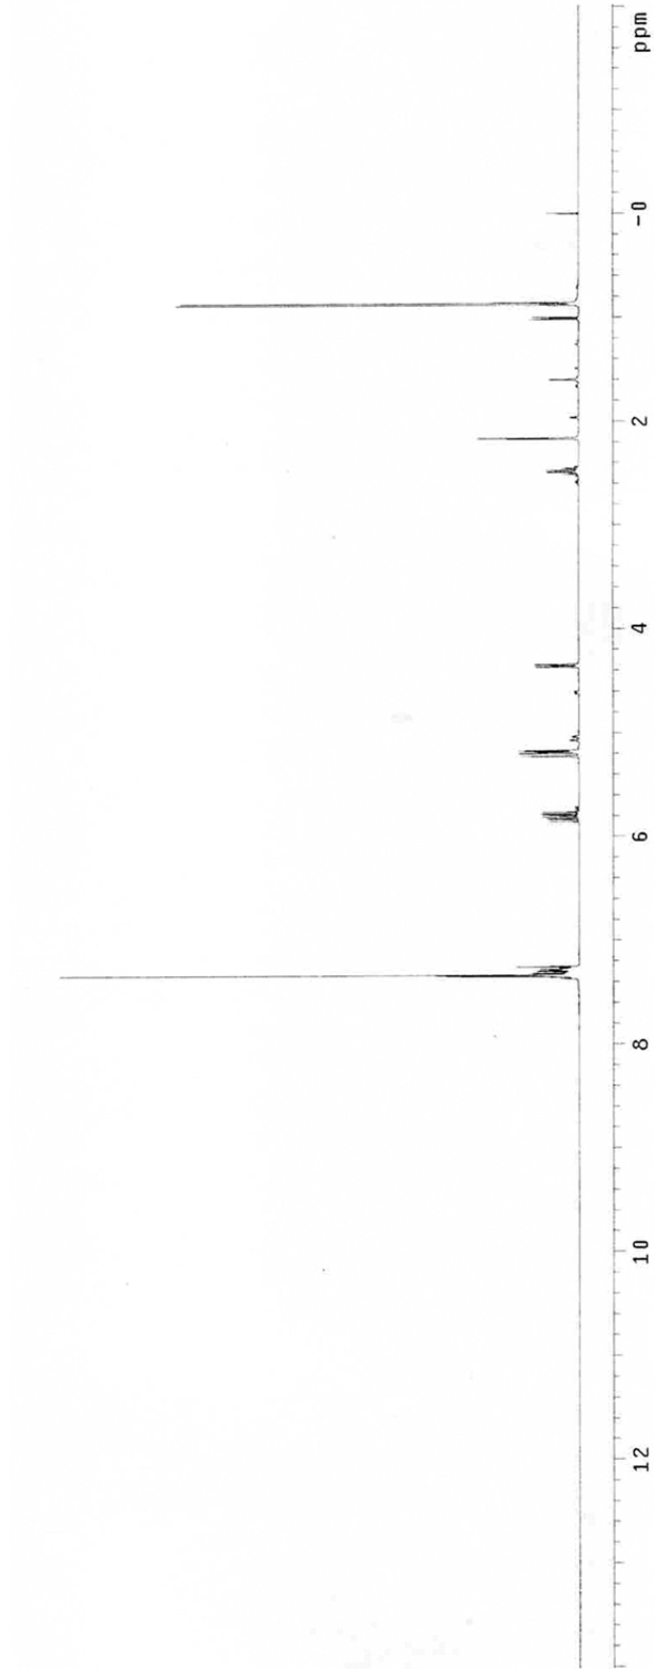

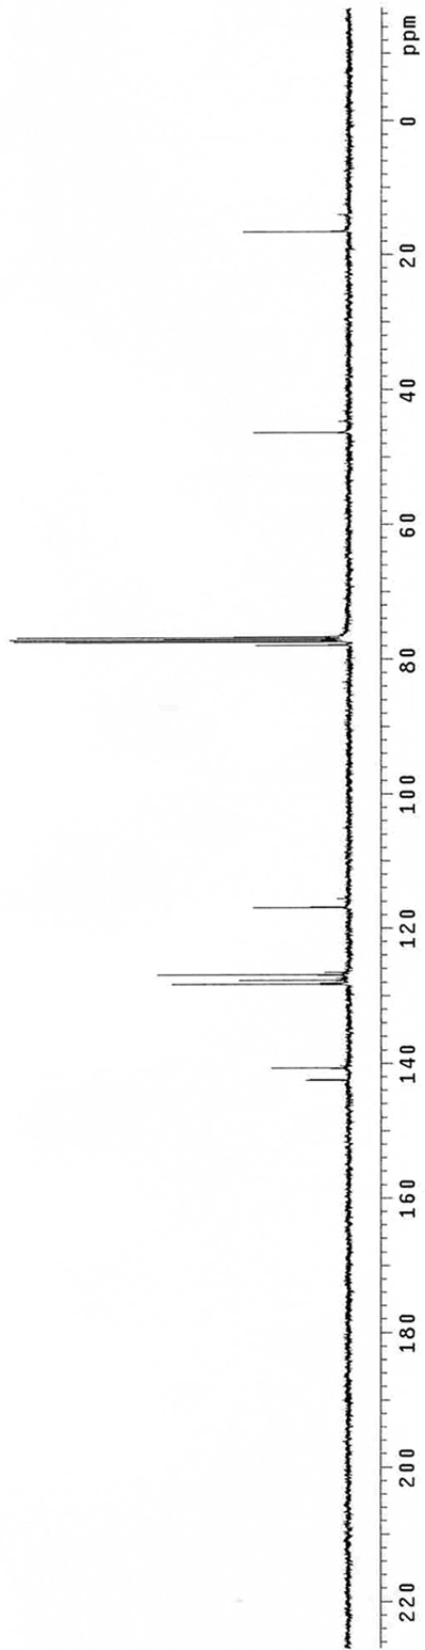

Racemic:

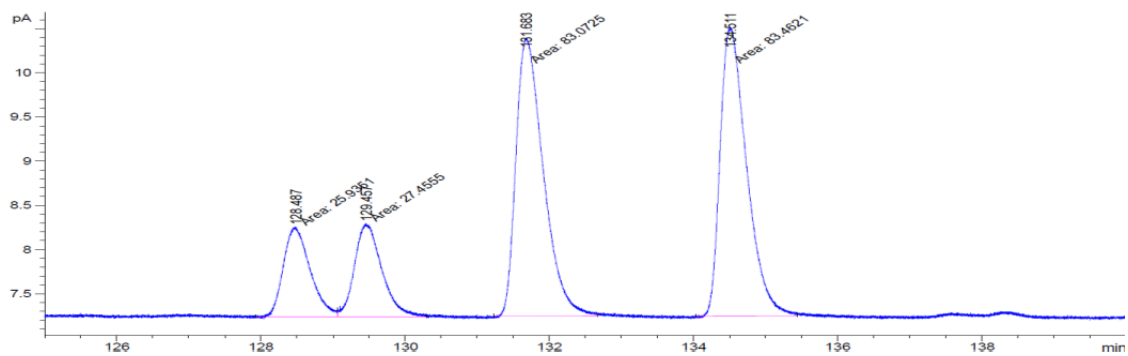

Signal 1: FID1 A, Front Signal

| Peak # | RetTime [min] | Type | Width [min] | Area [pA*s] | Height [pA] | Area %   |
|--------|---------------|------|-------------|-------------|-------------|----------|
| 1      | 128.487       | MM   | 0.4274      | 25.93510    | 1.01129     | 11.79269 |
| 2      | 129.457       | MM   | 0.4346      | 27.45553    | 1.05302     | 12.48403 |
| 3      | 131.683       | MM   | 0.4412      | 83.07246    | 3.13815     | 37.77306 |
| 4      | 134.511       | MM   | 0.4255      | 83.46207    | 3.26915     | 37.95022 |

Alcohol:

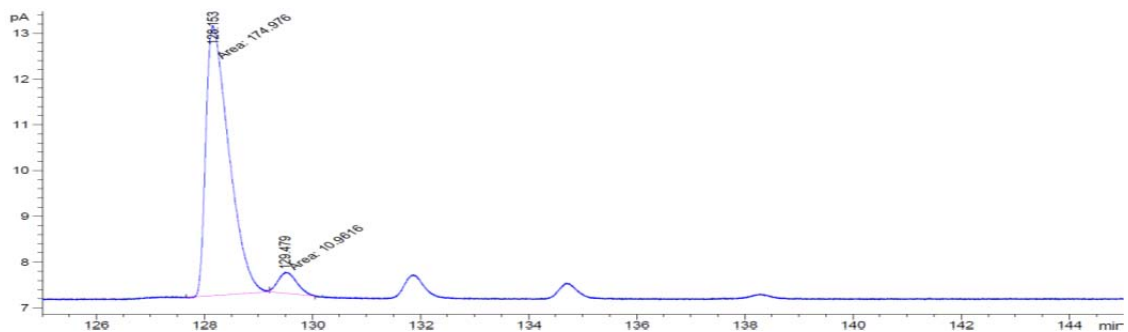

| Peak # | RetTime [min] | Type | Width [min] | Area [pA*s] | Height [pA] | Area %   |
|--------|---------------|------|-------------|-------------|-------------|----------|
| 1      | 128.150       | MM   | 0.4959      | 175.98094   | 5.91434     | 94.67967 |
| 2      | 129.534       | MM   | 0.3749      | 9.88889     | 4.39651e-1  | 5.32033  |

Aldehyde:

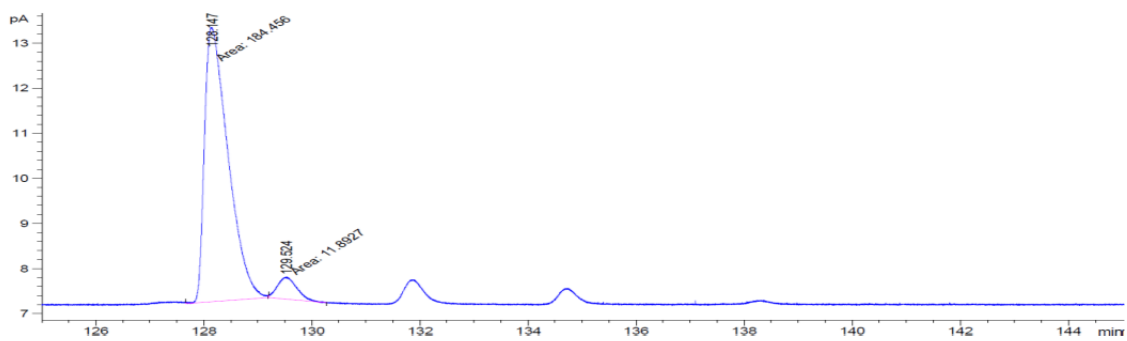

Signal 1: FID1 A, Front Signal

| Peak # | RetTime [min] | Type | Width [min] | Area [pA*s] | Height [pA] | Area %   |
|--------|---------------|------|-------------|-------------|-------------|----------|
| 1      | 128.147       | MM   | 0.5053      | 184.45619   | 6.08412     | 93.94308 |
| 2      | 129.524       | MM   | 0.4021      | 11.89270    | 4.92998e-1  | 6.05692  |

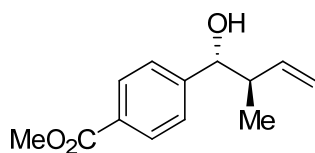

**Methyl 4-((1R,2R)-1-hydroxy-2-methylbut-3-en-1-yl)benzoate (3b)**

**From Alcohol Oxidation Level:** To a resealable pressure tube (13 x 100 mm) equipped with a magnetic stir bar was added  $\text{RuH}_2(\text{CO})(\text{PPh}_3)_3$  (13.8 mg, 0.015 mmol, 5 mol%), dppf (8.3 mg, 0.015 mmol, 5 mol%), (*R*)-phosphoric acid **A<sub>9</sub>** (15.1 mg, 0.03 mmol, 10 mol%) and alcohol **1b** (49.9 mg, 0.30 mmol, 100 mol%). The tube was sealed with a rubber septum and purged with nitrogen. Tetrahydrofuran (0.15 mL, 2.0 M concentration with respect to alcohol) was added and the solution was cooled to  $-78^\circ\text{C}$ . Butadiene (0.10 mL, 1.20 mmol, 400 mol%) was quickly added and the rubber septum was quickly replaced with a screw cap. The mixture was heated at  $95^\circ\text{C}$  (oil bath temperature) for 48 hrs, at which point the reaction mixture was allowed to cool to ambient temperature. The reaction mixture was concentrated *in vacuo* and purified by flash column chromatography ( $\text{SiO}_2$ ; 0-20% EtOAc/hexanes) to furnish the title compound (52.9 mg, 0.24 mmol, *anti:syn* = 7:1, 94:6 er) as a colorless oil in 80% yield.

**From Aldehyde Oxidation Level:** To a resealable pressure tube (13 x 100 mm) equipped with a magnetic stir bar was added  $\text{RuH}_2(\text{CO})(\text{PPh}_3)_3$  (13.8 mg, 0.015 mmol, 5 mol%), dppf (8.3 mg, 0.015 mmol, 5 mol%), (*R*)-phosphoric acid **A<sub>9</sub>** (15.1 mg, 0.03 mmol, 10 mol%) and aldehyde **2b** (49.2 mg, 0.30 mmol, 100 mol%). The tube was sealed with a rubber septum and purged with nitrogen. Tetrahydrofuran (0.15 mL, 2.0 M concentration with respect to alcohol) and 1,4-butanediol (0.053 mL, 0.60 mmol, 200 mol%) were added and the solution was cooled to  $-78^\circ\text{C}$ . Butadiene (0.10 mL, 1.20 mmol, 400 mol%) was quickly added and the rubber septum was quickly replaced with a screw cap. The mixture was heated at  $95^\circ\text{C}$  (oil bath temperature) for 48 hrs, at which point the reaction mixture was allowed to cool to ambient temperature. The reaction mixture was concentrated *in vacuo* and purified by flash column chromatography ( $\text{SiO}_2$ ; 0-20% EtOAc/hexanes) to furnish the title compound (52.9 mg, 0.24 mmol, *anti:syn* = 6:1, 93:7 er) as a colorless oil in 80% yield.

**<sup>1</sup>H NMR** (400 MHz,  $\text{CDCl}_3$ ):  $\delta$  7.97 (d,  $J$  = 8.0 Hz, 2H), 7.36 (d,  $J$  = 8.0 Hz, 2H), 5.79-5.69 (m, 1H), 5.17-5.12 (m, 2H), 4.40 (d,  $J$  = 7.2 Hz, 1H), 3.88 (s, 3H), 2.49-2.36 (m, 2H), 0.86 (d,  $J$  = 6.8 Hz, 3H).

**<sup>13</sup>C NMR** (100 MHz,  $\text{CDCl}_3$ ):  $\delta$  147.9, 140.1, 129.7, 129.6, 127.0, 117.5, 77.3, 52.3, 46.5, 16.6.

**LRMS** (CI+)  $m/z$  221  $[\text{M}+\text{H}]^+$

$[\alpha]_{\text{D}}^{25} = +41.4$  ( $c$  = 1.0,  $\text{CHCl}_3$ ).

**FTIR** (neat): 3467, 2953, 1719, 1435, 1276, 1177, 1110, 1017, 915, 810, 709  $\text{cm}^{-1}$ .

**HPLC** (Chiralcel AD-H column, hexanes:*i*-PrOH = 95:5, 0.5 mL/min, 230 nm),  $t_{\text{major}} = 27.9$  min,  $t_{\text{minor}} = 33.2$  min.

The spectroscopic properties of this compound were consistent with the data available in the literature (37).



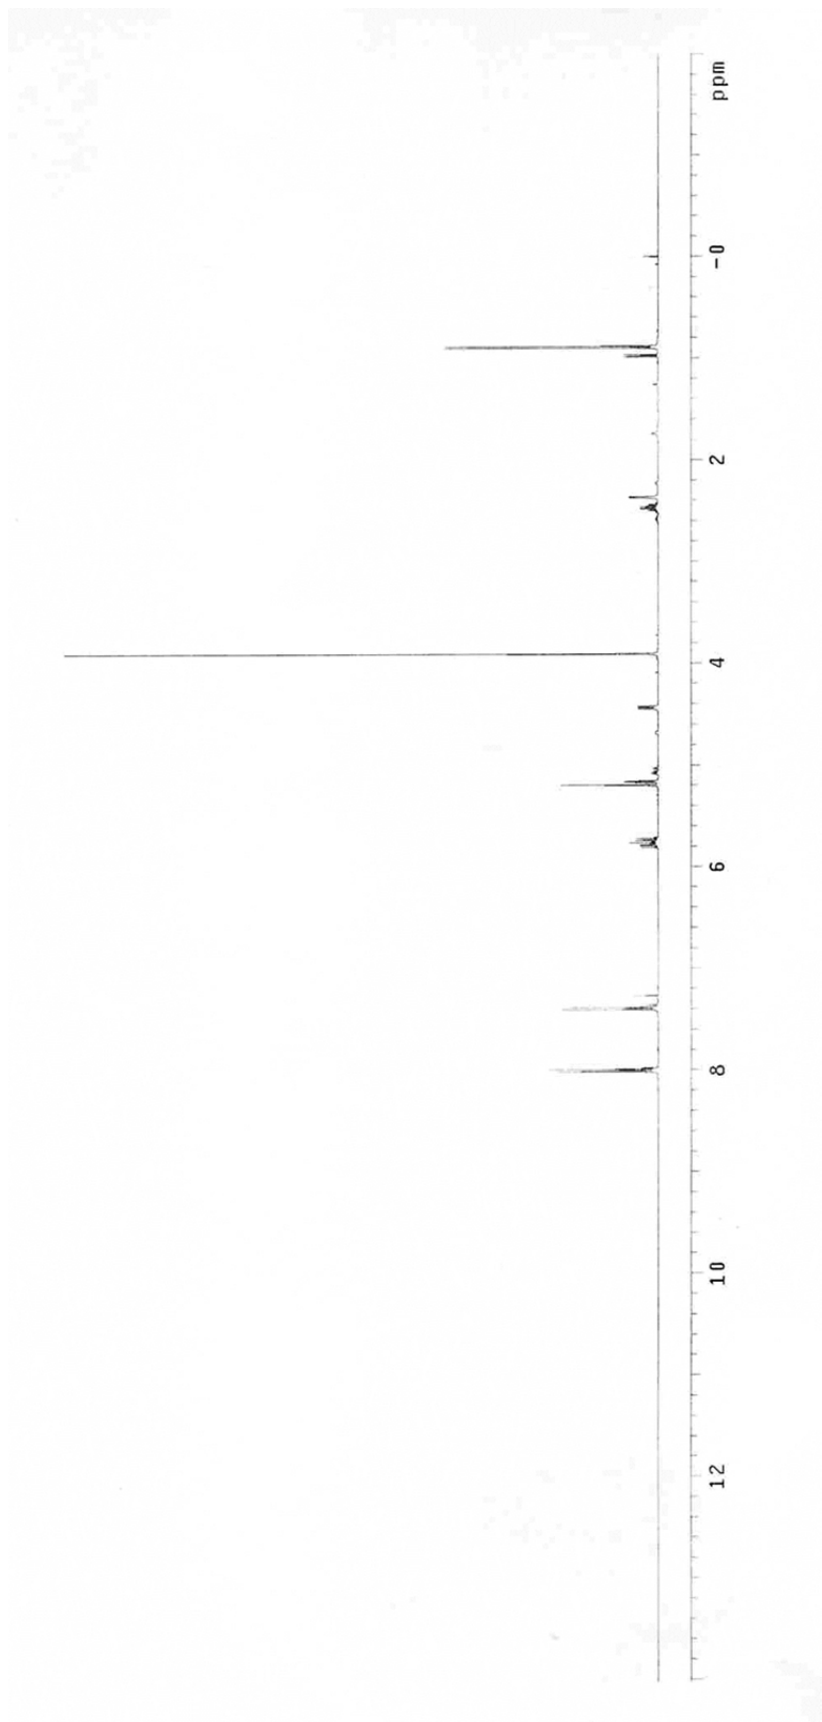

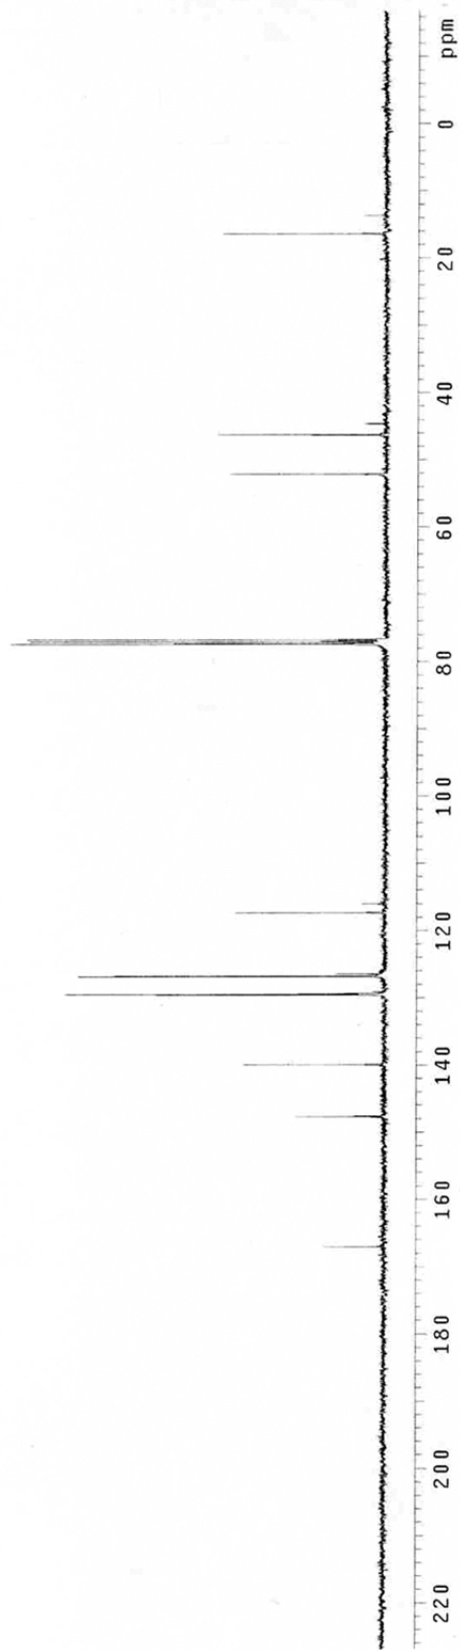

Racemic:

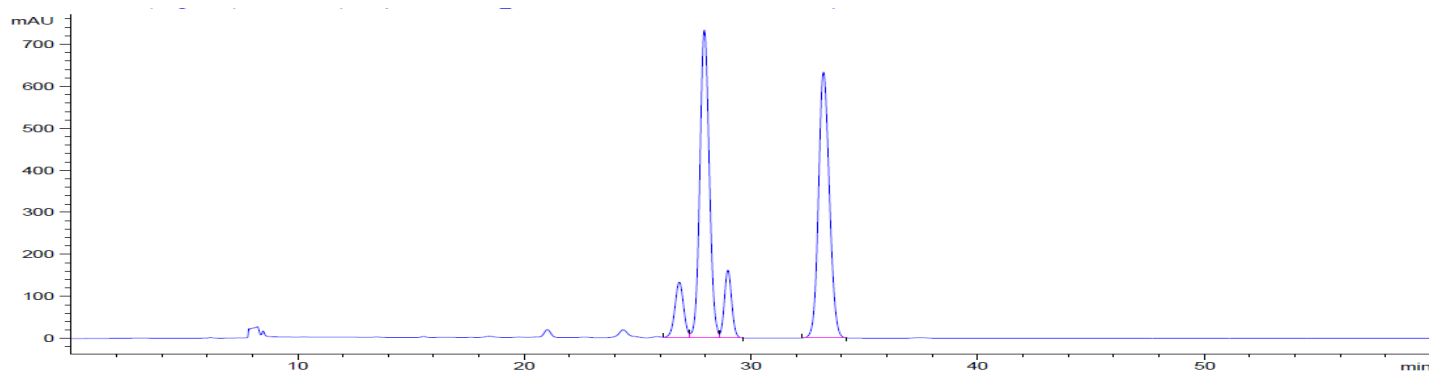

Signal 1: DAD1 D, Sig=230,16 Ref=360,100

| Peak # | RetTime [min] | Type | Width [min] | Area [mAU*s] | Height [mAU] | Area %  |
|--------|---------------|------|-------------|--------------|--------------|---------|
| 1      | 26.829        | VV   | 0.4213      | 3614.49023   | 132.89398    | 7.2899  |
| 2      | 27.934        | VV   | 0.4491      | 2.11800e4    | 732.98383    | 42.7168 |
| 3      | 28.972        | VB   | 0.3489      | 3641.41187   | 161.56358    | 7.3441  |
| 4      | 33.189        | BB   | 0.5157      | 2.11465e4    | 633.12537    | 42.6492 |

Alcohol:

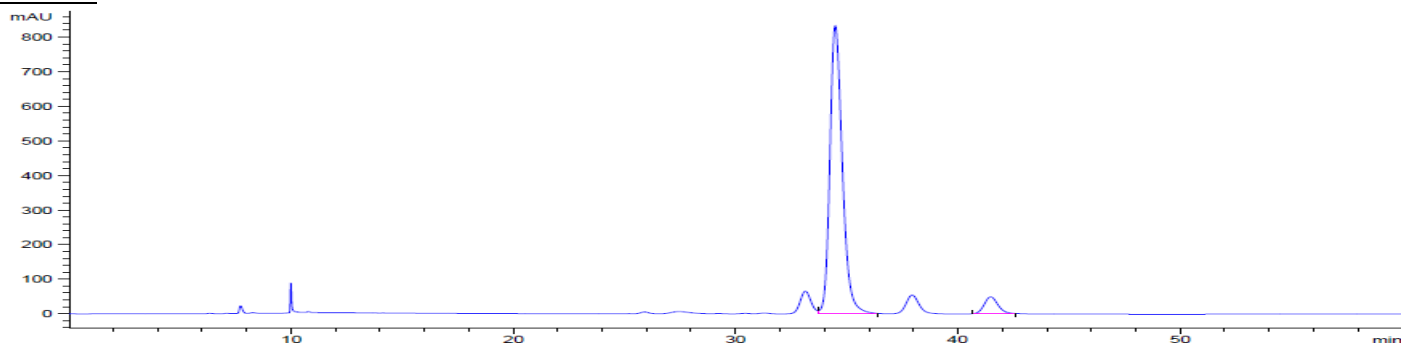

Signal 1: DAD1 D, Sig=230,16 Ref=360,100

| Peak # | RetTime [min] | Type | Width [min] | Area [mAU*s] | Height [mAU] | Area %  |
|--------|---------------|------|-------------|--------------|--------------|---------|
| 1      | 34.472        | VB   | 0.5980      | 3.24260e4    | 833.27014    | 93.8669 |
| 2      | 41.461        | BB   | 0.6686      | 2118.67383   | 49.17524     | 6.1331  |

Aldehyde:

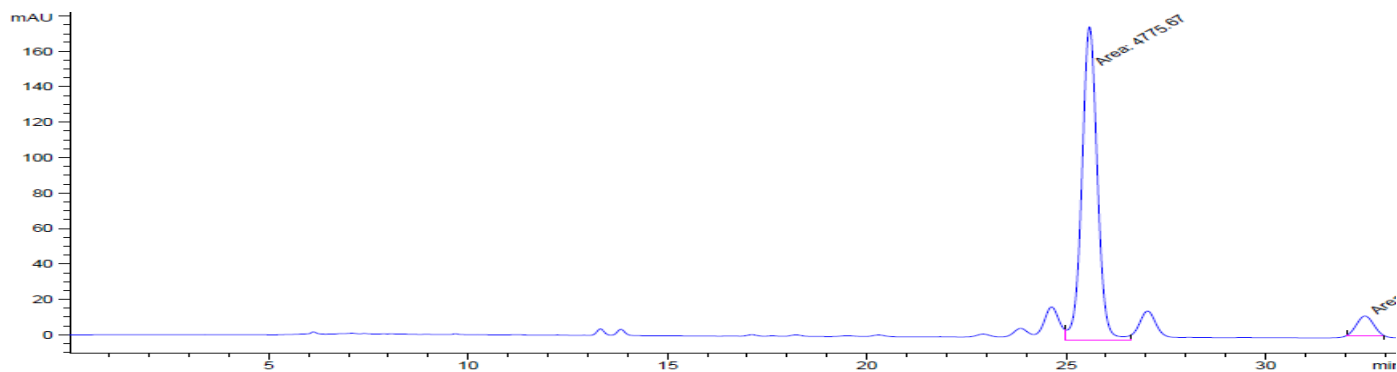

Signal 1: DAD1 D, Sig=230,16 Ref=360,100

| Peak # | RetTime [min] | Type | Width [min] | Area [mAU*s] | Height [mAU] | Area %  |
|--------|---------------|------|-------------|--------------|--------------|---------|
| 1      | 25.578        | MM   | 0.4504      | 4775.66992   | 176.73450    | 93.3899 |
| 2      | 32.485        | MM   | 0.4940      | 338.02231    | 11.40450     | 6.6101  |

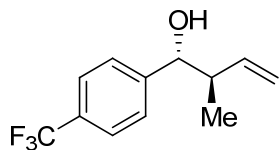

**(1R,2R)-2-methyl-1-(4-(trifluoromethyl)phenyl)but-3-en-1-ol (3c)**

**From Alcohol Oxidation Level:** To a resealable pressure tube (13 x 100 mm) equipped with a magnetic stir bar was added  $\text{RuH}_2(\text{CO})(\text{PPh}_3)_3$  (13.8 mg, 0.015 mmol, 5 mol%), dppf (8.3 mg, 0.015 mmol, 5 mol%), (*R*)-phosphoric acid **A<sub>9</sub>** (15.1 mg, 0.03 mmol, 10 mol%). The tube was sealed with a rubber septum and purged with nitrogen. Alcohol **1c** (0.041 mL, 0.30 mmol, 100 mol%) and tetrahydrofuran (0.15 mL, 2.0 M concentration with respect to alcohol) were added and the solution was cooled to  $-78^\circ\text{C}$ . Butadiene (0.10 mL, 1.20 mmol, 400 mol%) was quickly added and the rubber septum was quickly replaced with a screw cap. The mixture was heated at  $95^\circ\text{C}$  (oil bath temperature) for 48 hrs, at which point the reaction mixture was allowed to cool to ambient temperature. The reaction mixture was concentrated *in vacuo* and purified by flash column chromatography ( $\text{SiO}_2$ ; 0-20% EtOAc/hexanes) to furnish the title compound (57.3 mg, 0.25 mmol, *anti:syn* = 7:1, 96:4 er) as a colorless oil in 83% yield.

**From Aldehyde Oxidation Level:** To a resealable pressure tube (13 x 100 mm) equipped with a magnetic stir bar was added  $\text{RuH}_2(\text{CO})(\text{PPh}_3)_3$  (13.8 mg, 0.015 mmol, 5 mol%), dppf (8.3 mg, 0.015 mmol, 5 mol%), (*R*)-phosphoric acid **A<sub>9</sub>** (15.1 mg, 0.03 mmol, 10 mol%). The tube was sealed with a rubber septum and purged with nitrogen. Aldehyde **3a** (0.041 mL, 0.30 mmol, 100 mol%), tetrahydrofuran (0.15 mL, 2.0 M concentration with respect to alcohol) and 1,4-butanediol (0.053 mL, 0.60 mmol, 200 mol%) were added and the solution was cooled to  $-78^\circ\text{C}$ . Butadiene (0.10 mL, 1.20 mmol, 400 mol%) was quickly added and the rubber septum was quickly replaced with a screw cap. The mixture was heated at  $95^\circ\text{C}$  (oil bath temperature) for 48 hrs, at which point the reaction mixture was allowed to cool to ambient temperature. The reaction mixture was concentrated *in vacuo* and purified by flash column chromatography ( $\text{SiO}_2$ ; 0-10% EtOAc/hexanes) to furnish the title compound (43.6 mg, 0.19 mmol, *anti:syn* = 6:1, 94:6 er) as a colorless oil in 63% yield.

**<sup>1</sup>H NMR** (400 MHz,  $\text{CDCl}_3$ ):  $\delta$  7.60 (d,  $J$  = 8.0 Hz, 2H), 7.44 (d,  $J$  = 8.0 Hz, 2H), 5.81-5.72 (m, 1H), 5.23-5.18 (m, 2H), 4.43 (dd,  $J$  = 7.2 Hz, 2.6 Hz, 1H), 2.51-2.42 (m, 1H), 2.26 (d,  $J$  = 2.6 Hz, 1H) 0.89 (d,  $J$  = 6.8 Hz, 3H).

**<sup>13</sup>C NMR** (100 MHz,  $\text{CDCl}_3$ ):  $\delta$  146.3, 139.8, 129.7 (q,  $J$  = 32 Hz), 127.1, 125.2 (q,  $J$  = 3.7 Hz), 124.0 (q,  $J$  = 271 Hz), 117.6, 77.2, 46.4, 16.4 ppm.

**LRMS** (CI+)  $m/z$  213 [M-OH]<sup>+</sup>

$[\alpha]_{\text{D}}^{25} = +52$  (c = 1.0,  $\text{CHCl}_3$ ) reported for 92% ee of the (*R,R*) compound  $[\alpha]_{\text{D}}^{25} = +55$  (c = 1.0,  $\text{CHCl}_3$ ).

**FTIR** (neat): 3380, 2976, 1620, 1458, 1418, 1323, 1162, 1120, 1066, 1016, 917, 831, 763, 741, 684  $\text{cm}^{-1}$

**HPLC** (Compound **3c** was converted to the 4-nitro-benzoate for analysis, Chiralcel OD-H/OD-H/OD-H column, hexanes:*i*-PrOH = 97:3, 0.3 mL/min, 254 nm),  $t_{\text{major}} = 71.5$  min,  $t_{\text{minor}} = 75.9$  min

The spectroscopic properties of this compound were consistent with the data available in the literature (38).

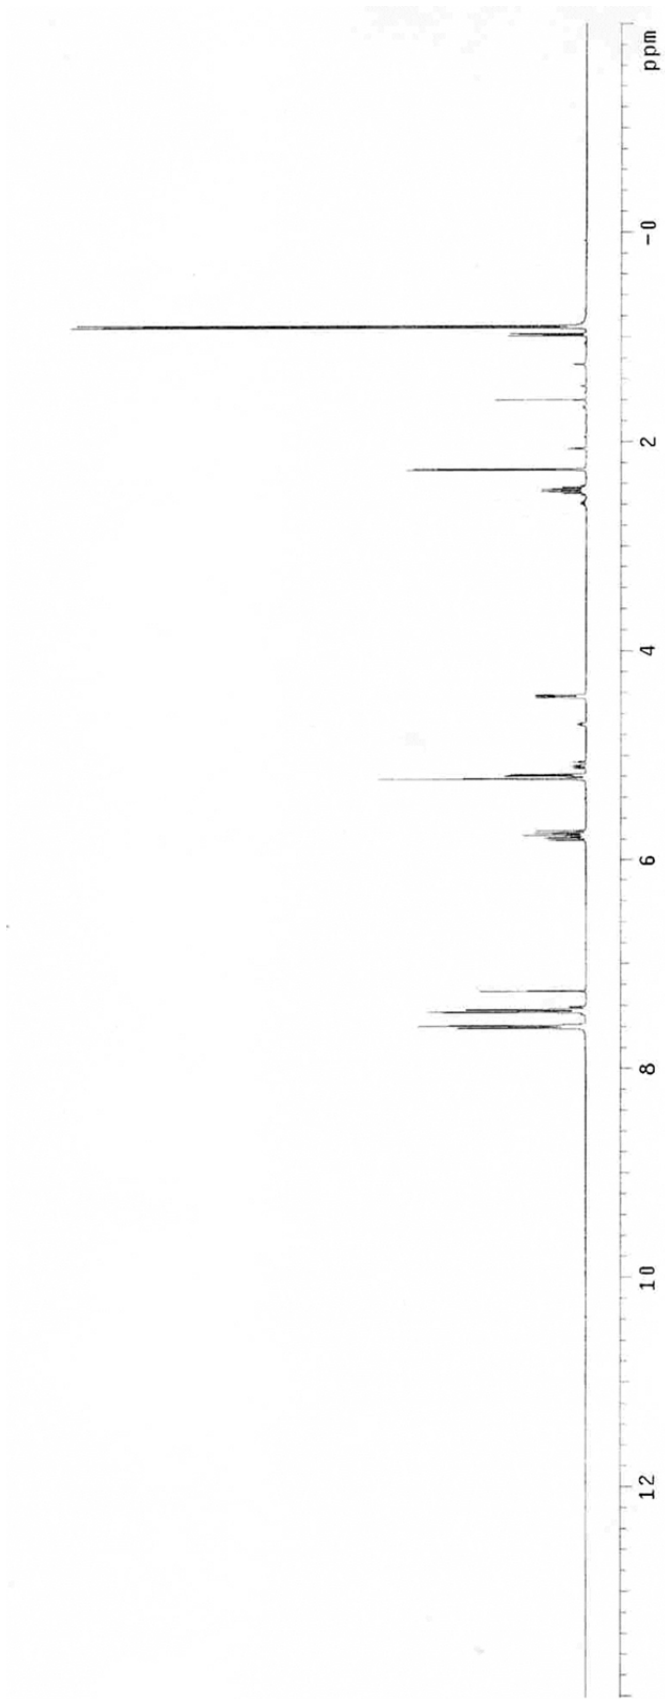

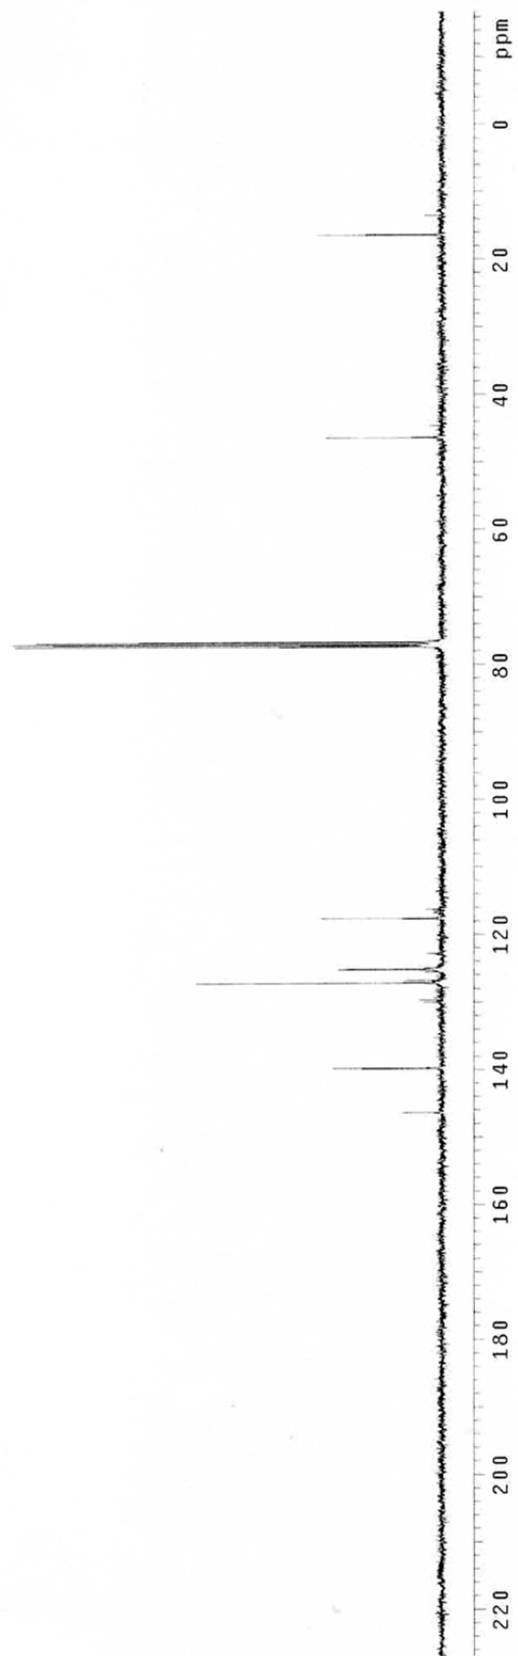

Racemic:

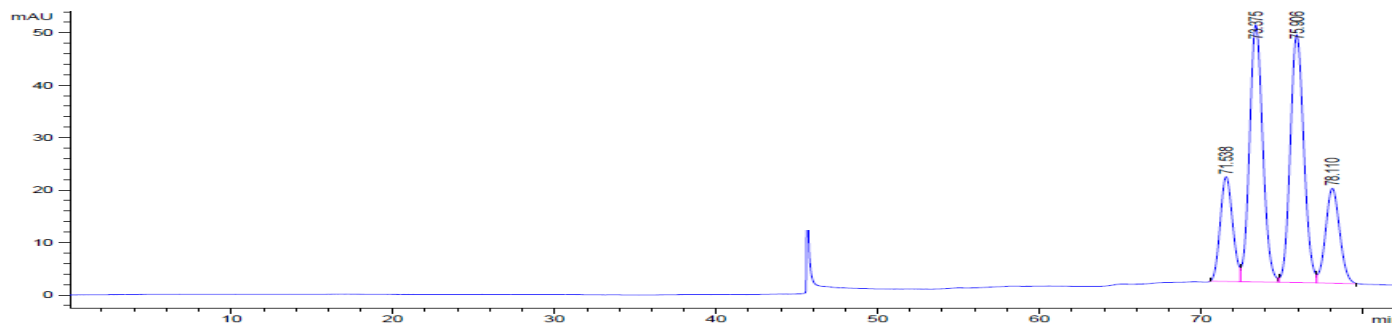

Signal 1: DAD1 B, Sig=254,16 Ref=360,100

| Peak # | RetTime [min] | Type | Width [min] | Area [mAU*s] | Height [mAU] | Area %  |
|--------|---------------|------|-------------|--------------|--------------|---------|
| 1      | 71.538        | BV   | 0.8227      | 1070.34790   | 19.99071     | 13.8908 |
| 2      | 73.375        | VB   | 0.8762      | 2782.27124   | 49.01735     | 36.1078 |
| 3      | 75.906        | BV   | 0.9000      | 2755.28467   | 47.27272     | 35.7575 |
| 4      | 78.110        | VB   | 0.9231      | 1097.55933   | 18.10957     | 14.2439 |

Alcohol:

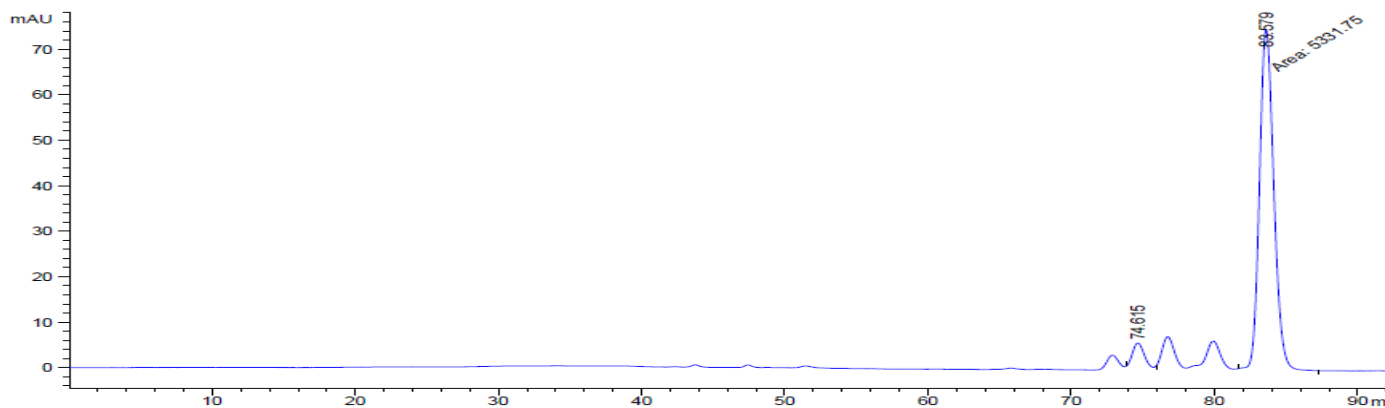

Signal 1: DAD1 B, Sig=254,16 Ref=360,100

| Peak # | RetTime [min] | Type | Width [min] | Area [mAU*s] | Height [mAU] | Area %  |
|--------|---------------|------|-------------|--------------|--------------|---------|
| 1      | 74.615        | BB   | 0.6295      | 251.10977    | 5.02046      | 4.4979  |
| 2      | 83.579        | MM   | 1.1806      | 5331.75098   | 75.27206     | 95.5021 |



Aldehyde:

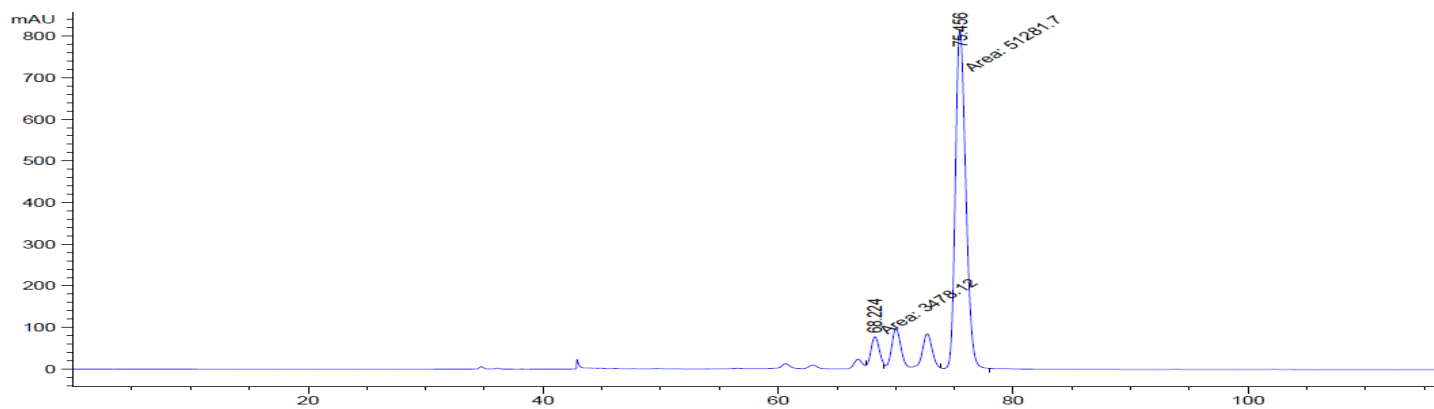

Signal 1: DAD1 B, Sig=254,16 Ref=360,100

| Peak # | RetTime [min] | Type | Width [min] | Area [mAU*s] | Height [mAU] | Area %  |
|--------|---------------|------|-------------|--------------|--------------|---------|
| 1      | 68.224        | MM   | 0.8067      | 3478.12378   | 71.85876     | 6.3516  |
| 2      | 75.456        | MM   | 1.0425      | 5.12817e4    | 819.85419    | 93.6484 |

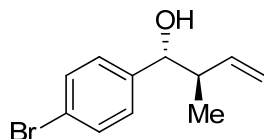

(1R,2R)-1-(4-bromophenyl)-2-methylbut-3-en-1-ol (**3d**)

**From Alcohol Oxidation Level:** To a resealable pressure tube (13 x 100 mm) equipped with a magnetic stir bar was added  $\text{RuH}_2(\text{CO})(\text{PPh}_3)_3$  (13.8 mg, 0.015 mmol, 5 mol%), dppf (8.3 mg, 0.015 mmol, 5 mol%), (*R*)-phosphoric acid **A<sub>9</sub>** (15.1 mg, 0.03 mmol, 10 mol%) and alcohol **1d** (56.1 mg, 0.30 mmol, 100 mol%). The tube was sealed with a rubber septum and purged with nitrogen. Tetrahydrofuran (0.15 mL, 2.0 M concentration with respect to alcohol) was added and the solution was cooled to  $-78^\circ\text{C}$ . Butadiene (0.10 mL, 1.20 mmol, 400 mol%) was quickly added and the rubber septum was quickly replaced with a screw cap. The mixture was heated at  $95^\circ\text{C}$  (oil bath temperature) for 48 hrs, at which point the reaction mixture was allowed to cool to ambient temperature. The reaction mixture was concentrated *in vacuo* and purified by flash column chromatography ( $\text{SiO}_2$ ; 0-20% EtOAc/hexanes) to furnish the title compound (70.2 mg, 0.29 mmol, *anti:syn* = 5:1, 93:7 er) as a colorless oil in 83% yield.

**From Aldehyde Oxidation Level:** To a resealable pressure tube (13 x 100 mm) equipped with a magnetic stir bar was added  $\text{RuH}_2(\text{CO})(\text{PPh}_3)_3$  (13.8 mg, 0.015 mmol, 5 mol%), dppf (8.3 mg, 0.015 mmol, 5 mol%), (*R*)-phosphoric acid **A<sub>9</sub>** (15.1 mg, 0.03 mmol, 10 mol%) and aldehyde **2d** (55.5 mg, 0.30 mmol, 100 mol%). The tube was sealed with a rubber septum and purged with nitrogen. Tetrahydrofuran (0.15 mL, 2.0 M concentration with respect to alcohol) and 1,4-butanediol (0.053 mL, 0.60 mmol, 200 mol%) were added and the solution was cooled to  $-78^\circ\text{C}$ . Butadiene (0.10 mL, 1.20 mmol, 400 mol%) was quickly added and the rubber septum was quickly replaced with a screw cap. The mixture was heated at  $95^\circ\text{C}$  (oil bath temperature) for 48 hrs, at which point the reaction mixture was allowed to cool to ambient temperature. The reaction mixture was concentrated *in vacuo* and purified by flash column chromatography ( $\text{SiO}_2$ ; 0-20% EtOAc/hexanes) to furnish the title compound (58.7 mg, 0.24 mmol, *anti:syn* = 5:1, 93:7 er) as a colorless oil in 81% yield.

**<sup>1</sup>H NMR** (400 MHz,  $\text{CDCl}_3$ ):  $\delta$  7.46 (d,  $J$  = 8.0 Hz, 2H), 7.18 (d,  $J$  = 8.0 Hz, 2H), 5.81-5.71 (m, 1H), 5.22-5.16 (m, 2H), 4.32 (d,  $J$  = 7.6 Hz, 1H), 2.45-2.37 (m, 1H), 2.20 (s, 1H), 0.87 (d,  $J$  = 6.8 Hz, 3H).

**<sup>13</sup>C NMR** (100 MHz,  $\text{CDCl}_3$ ):  $\delta$  141.4, 140.1, 131.3, 128.6, 121.4, 117.3, 77.1, 46.4, 16.4 ppm.

**LRMS** (CI+).  $m/z$  223  $[\text{M}-\text{OH}]^+$

$[\alpha]_{\text{D}}^{25} = +53$  ( $c$  = 1.0,  $\text{CHCl}_3$ ).

**FTIR** (neat): 3404, 2972, 2928, 1486, 1070, 1009, 916, 817, 755, 666  $\text{cm}^{-1}$ .

**HPLC** (Chiralcel AS-H/AS-H column, hexanes:*i*-PrOH = 98.5:1.5, 0.5 mL/min, 230 nm),  $t_{\text{major}} = 36.1$  min,  $t_{\text{minor}} = 42.1$  min.

The spectroscopic properties of this compound were consistent with the data available in the literature (37).

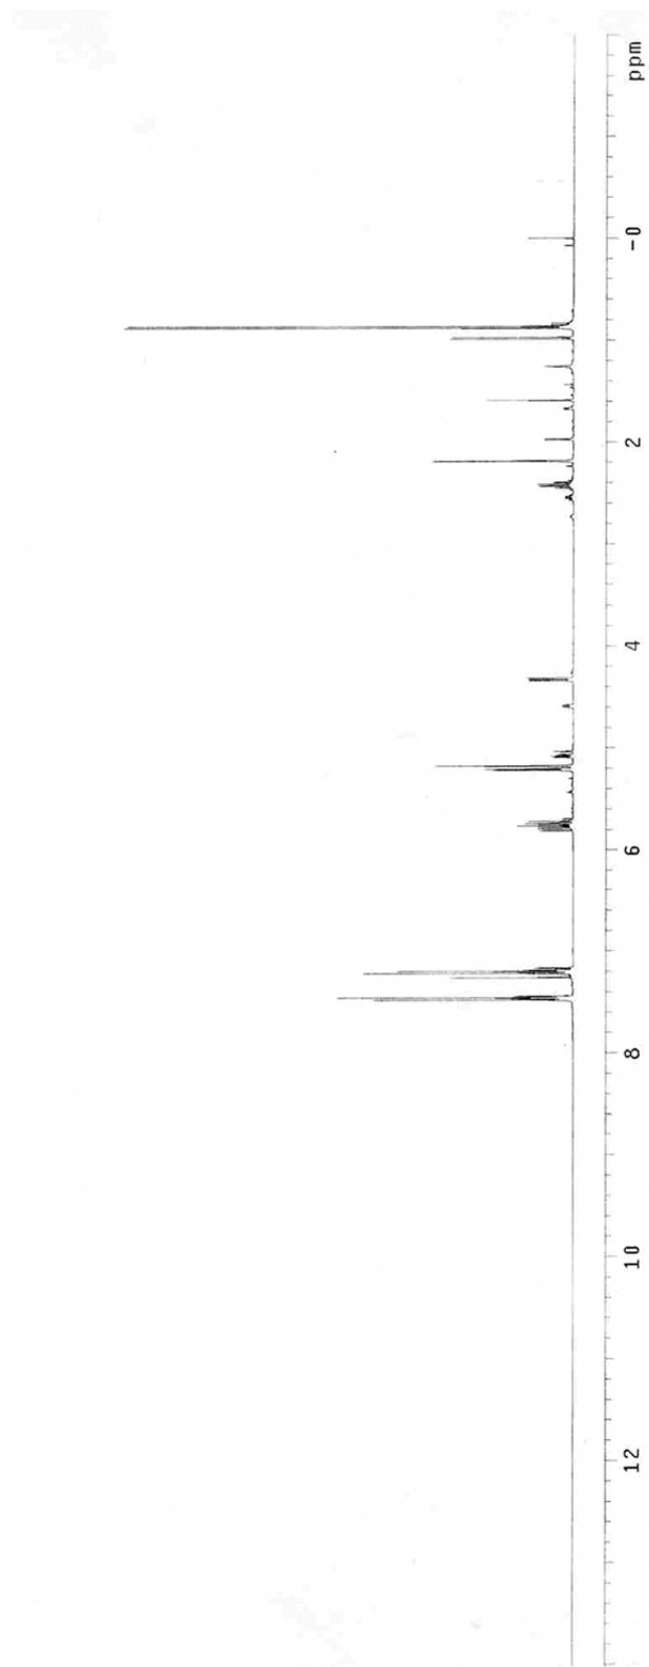

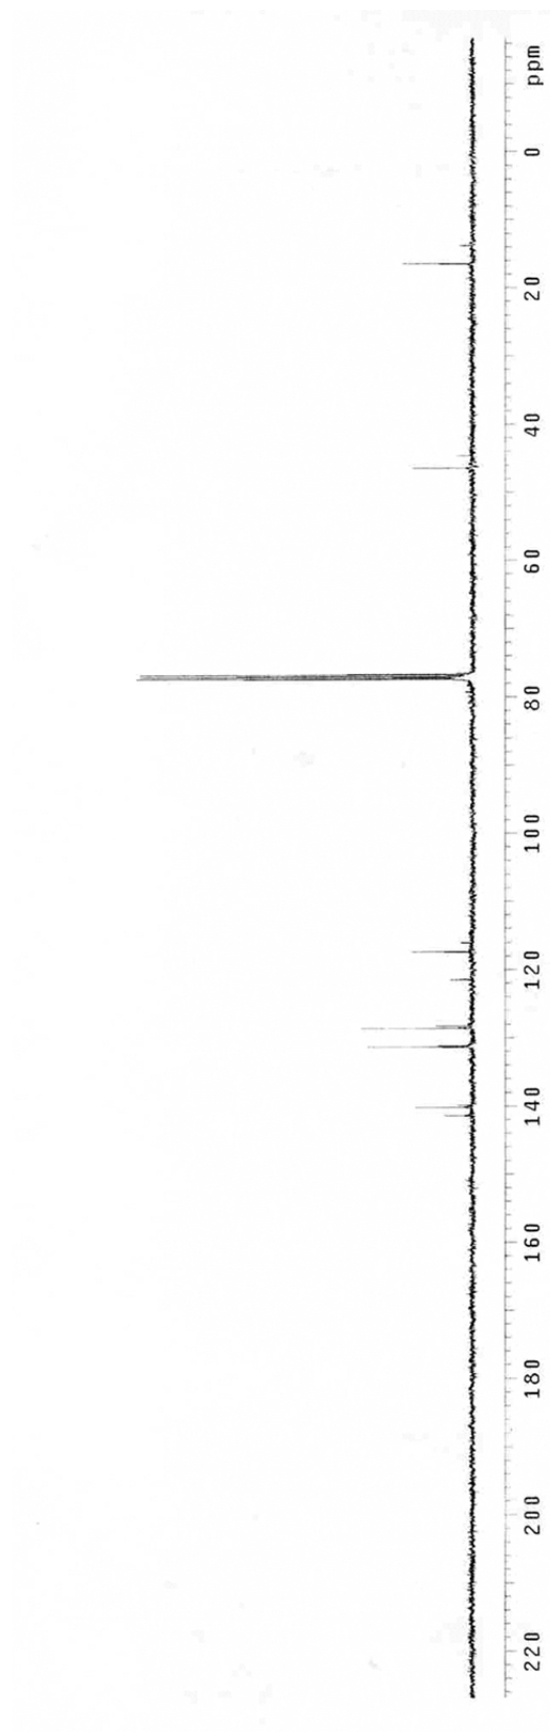

### Racemic:

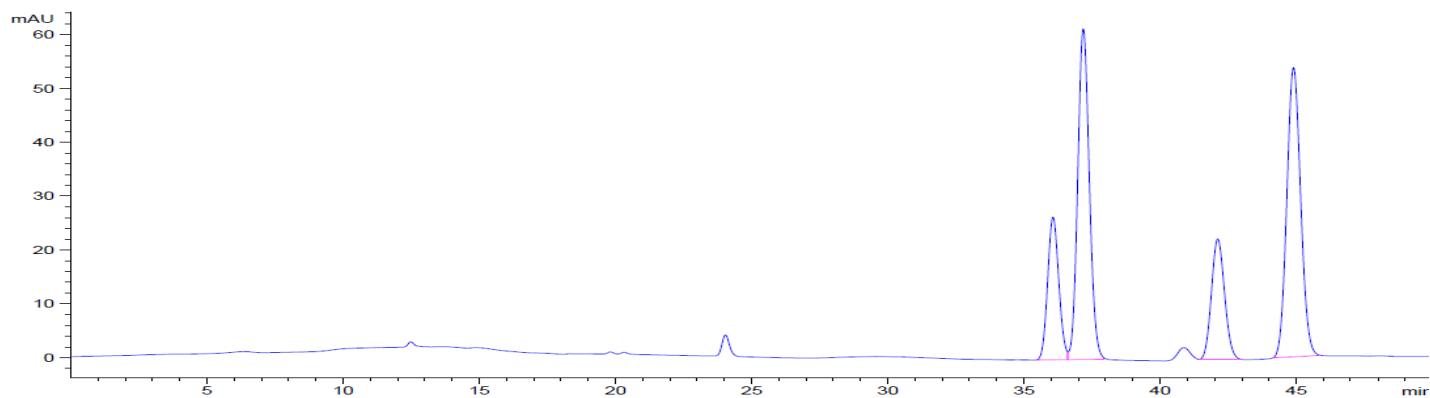

Signal 1: DAD1 D, Sig=230,16 Ref=360,100

| Peak # | RetTime [min] | Type | Width [min] | Area [mAU*s] | Height [mAU] | Area %  |
|--------|---------------|------|-------------|--------------|--------------|---------|
| 1      | 36.059        | BV   | 0.4445      | 755.69861    | 26.51514     | 14.4623 |
| 2      | 37.171        | VB   | 0.4590      | 1816.62524   | 61.43822     | 34.7659 |
| 3      | 42.107        | VB   | 0.5178      | 753.44275    | 22.43484     | 14.4191 |
| 4      | 44.890        | BB   | 0.5520      | 1899.53650   | 53.78403     | 36.3527 |

### Alcohol:

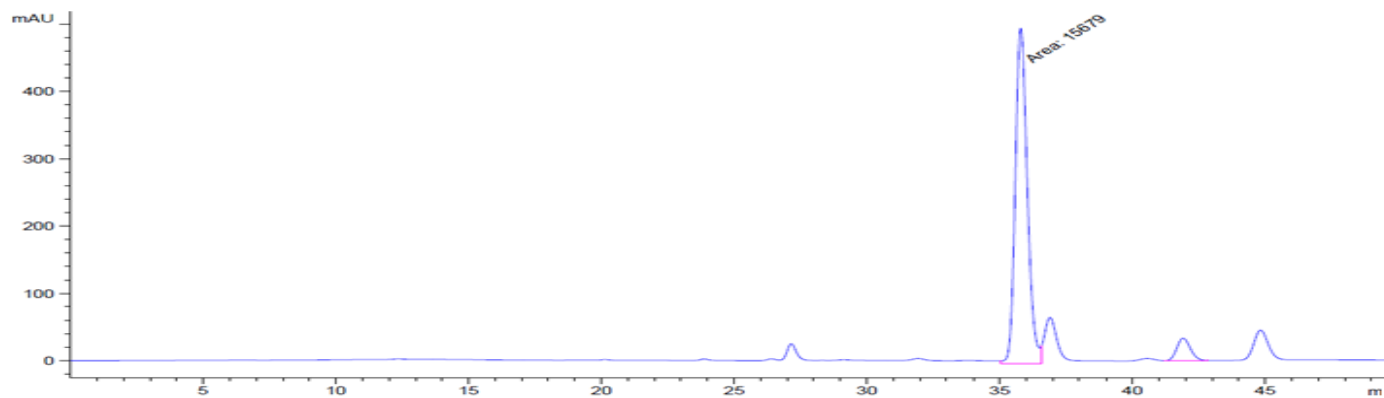

Signal 1: DAD1 D, Sig=230,16 Ref=360,100

| Peak # | RetTime [min] | Type | Width [min] | Area [mAU*s] | Height [mAU] | Area %  |
|--------|---------------|------|-------------|--------------|--------------|---------|
| 1      | 35.784        | MM   | 0.5248      | 1.56790e4    | 497.92374    | 92.9868 |
| 2      | 41.902        | VB   | 0.5521      | 1182.53137   | 33.47377     | 7.0132  |

Aldehyde:

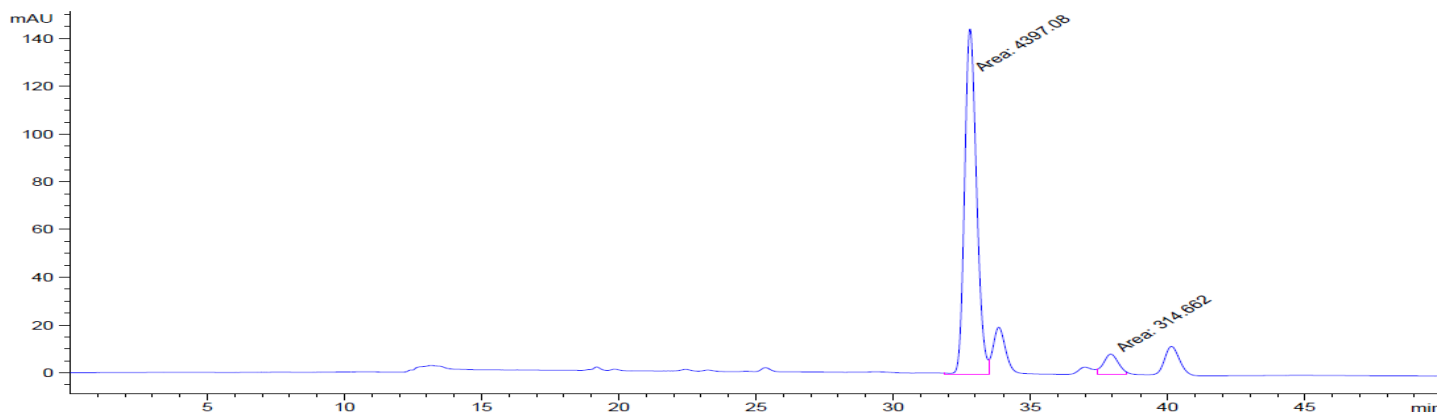

Signal 1: DAD1 D, Sig=230,16 Ref=360,100

| Peak # | RetTime [min] | Type | Width [min] | Area [mAU*s] | Height [mAU] | Area %  |
|--------|---------------|------|-------------|--------------|--------------|---------|
| 1      | 32.791        | MM   | 0.5067      | 4397.08496   | 144.62340    | 93.3218 |
| 2      | 37.920        | MM   | 0.6218      | 314.66193    | 8.43464      | 6.6782  |

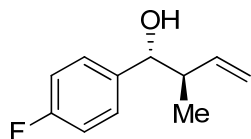

**(1R,2R)-1-(4-fluorophenyl)-2-methylbut-3-en-1-ol (3e)**

**From Alcohol Oxidation Level:** To a resealable pressure tube (13 x 100 mm) equipped with a magnetic stir bar was added  $\text{RuH}_2(\text{CO})(\text{PPh}_3)_3$  (13.8 mg, 0.015 mmol, 5 mol%), dppf (8.3 mg, 0.015 mmol, 5 mol%), (*R*)-phosphoric acid **A<sub>9</sub>** (15.1 mg, 0.03 mmol, 10 mol%). The tube was sealed with a rubber septum and purged with nitrogen. Alcohol **1e** (0.033 mL, 0.30 mmol, 100 mol%) and tetrahydrofuran (0.15 mL, 2.0 M concentration with respect to alcohol) were added and the solution was cooled to  $-78^\circ\text{C}$ . Butadiene (0.10 mL, 1.20 mmol, 400 mol%) was quickly added and the rubber septum was quickly replaced with a screw cap. The mixture was heated at  $95^\circ\text{C}$  (oil bath temperature) for 48 hrs, at which point the reaction mixture was allowed to cool to ambient temperature. The reaction mixture was concentrated *in vacuo* and purified by flash column chromatography ( $\text{SiO}_2$ ; 0-20% EtOAc/hexanes) to furnish the title compound (45.8 mg, 0.26 mmol, *anti:syn* = 6:1, 93:7 er) as a colorless oil in 85% yield.

**From Aldehyde Oxidation Level:** To a resealable pressure tube (13 x 100 mm) equipped with a magnetic stir bar was added  $\text{RuH}_2(\text{CO})(\text{PPh}_3)_3$  (13.8 mg, 0.015 mmol, 5 mol%), dppf (8.3 mg, 0.015 mmol, 5 mol%), (*R*)-phosphoric acid **A<sub>9</sub>** (15.1 mg, 0.03 mmol, 10 mol%). The tube was sealed with a rubber septum and purged with nitrogen. Aldehyde **2e** (0.032 mL, 0.30 mmol, 100 mol%), tetrahydrofuran (0.15 mL, 2.0 M concentration with respect to alcohol) and 1,4-butanediol (0.053 mL, 0.60 mmol, 200 mol%) were added and the solution was cooled to  $-78^\circ\text{C}$ . Butadiene (0.10 mL, 1.20 mmol, 400 mol%) was quickly added and the rubber septum was quickly replaced with a screw cap. The mixture was heated at  $95^\circ\text{C}$  (oil bath temperature) for 48 hrs, at which point the reaction mixture was allowed to cool to ambient temperature. The reaction mixture was concentrated *in vacuo* and purified by flash column chromatography ( $\text{SiO}_2$ ; 0-20% EtOAc/hexanes) to furnish the title compound (43.2 mg, 0.24 mmol, *anti:syn* = 5:1, 94:6 er) as a colorless oil in 80% yield.

**<sup>1</sup>H NMR** (400 MHz,  $\text{CDCl}_3$ ):  $\delta$  7.31-7.26 (m, 2H), 7.05-7.00 (m, 2H), 5.82-5.73 (m, 1H), 5.22-5.17 (m, 2H), 4.33 (dd,  $J = 7.6$  Hz, 2.4 Hz, 1H), 2.47-2.38 (m, 1H), 2.24 (d,  $J = 2.4$  Hz, 1H), 0.85 (d,  $J = 6.8$  Hz, 3H).

**<sup>13</sup>C NMR** (100 MHz,  $\text{CDCl}_3$ ):  $\delta$  162.3 (d, 244.0 Hz), 140.4, 138.1 (d, 3.0 Hz), 128.4 (d, 8.2 Hz), 117.1, 115.0 (d, 21.6 Hz), 77.1, 46.5, 16.5 ppm.

**LRMS** (CI+).  $m/z$  181  $[\text{M}+\text{H}]^+$

$[\alpha]_{\text{D}}^{25} = +56.6$  ( $c = 1.0$ ,  $\text{CHCl}_3$ ).

**FTIR** (neat): 3411 3412, 2975, 1634, 1603, 1509, 1417, 1220, 1157, 1012, 829, 676  $\text{cm}^{-1}$ .

**GC:** Cyclosil-B: Initial temperature:  $50^\circ\text{C}$  (5 min hold);  $50$ - $100^\circ\text{C}$ , rate:  $0.4^\circ\text{C}/\text{min}$  (25 min hold);  $100$ - $150^\circ\text{C}$ , rate:  $0.4^\circ\text{C}/\text{min}$   $t_{\text{major}} = 153.2$  min,  $t_{\text{minor}} = 159.1$  min.

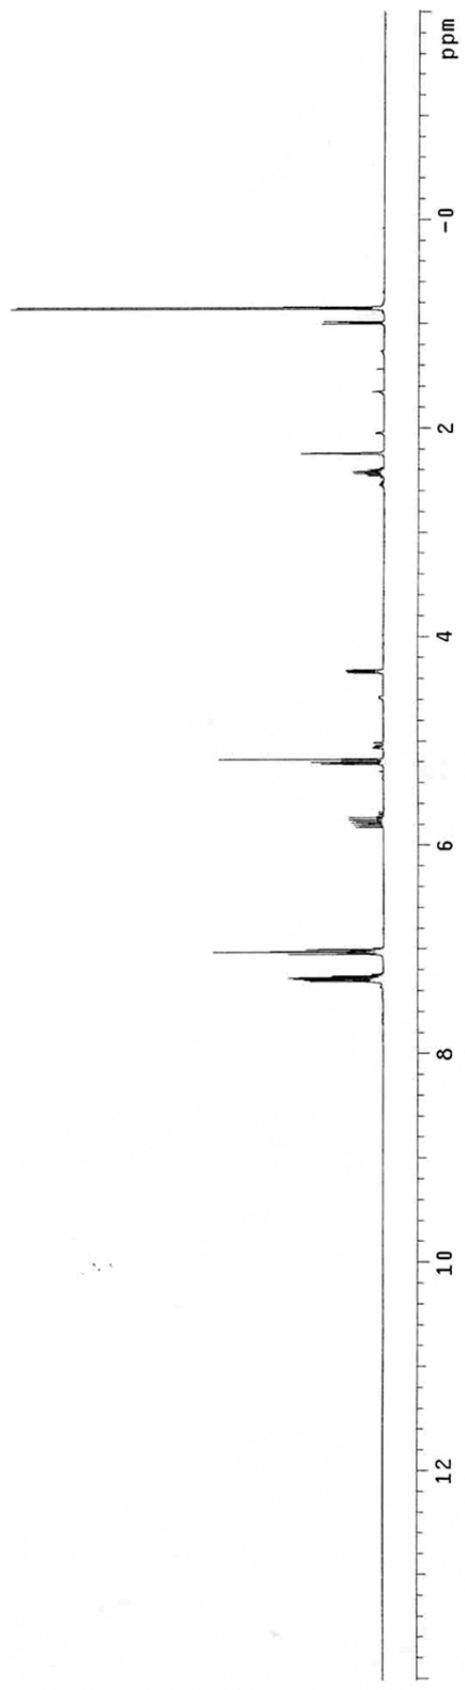



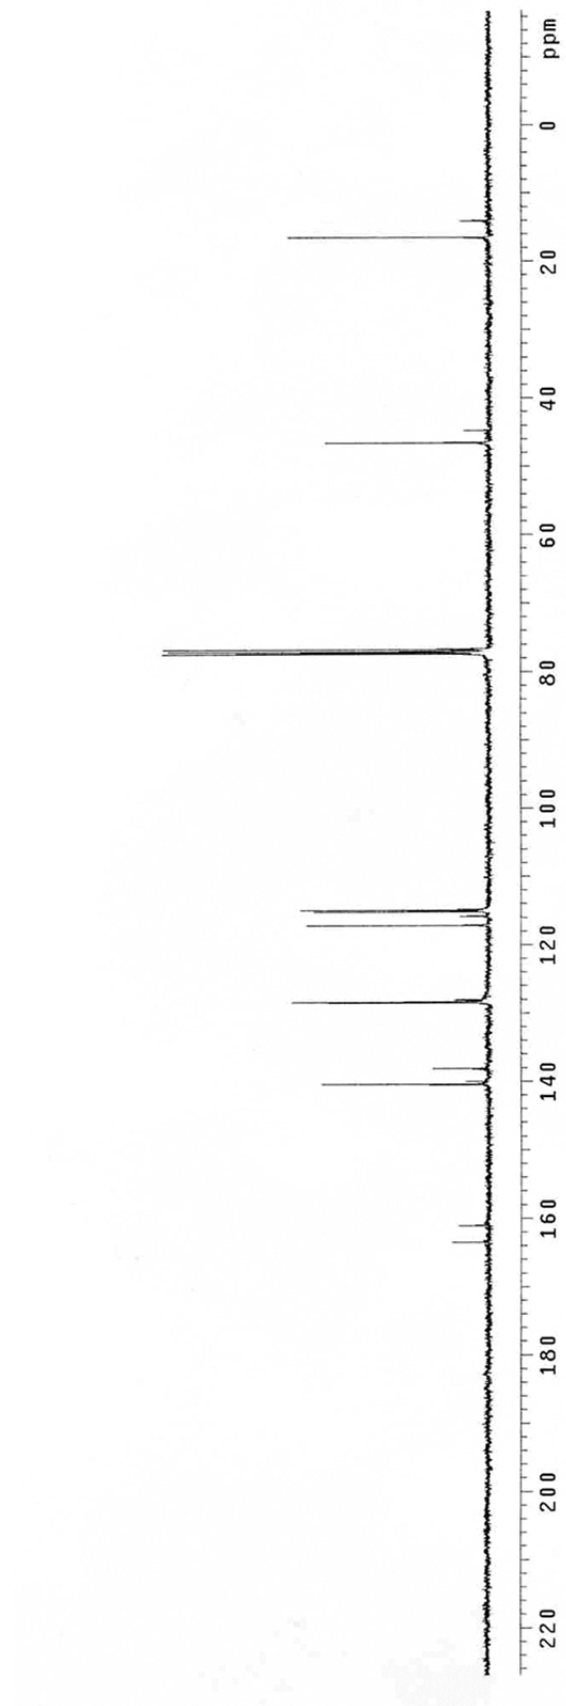

### Racemic:

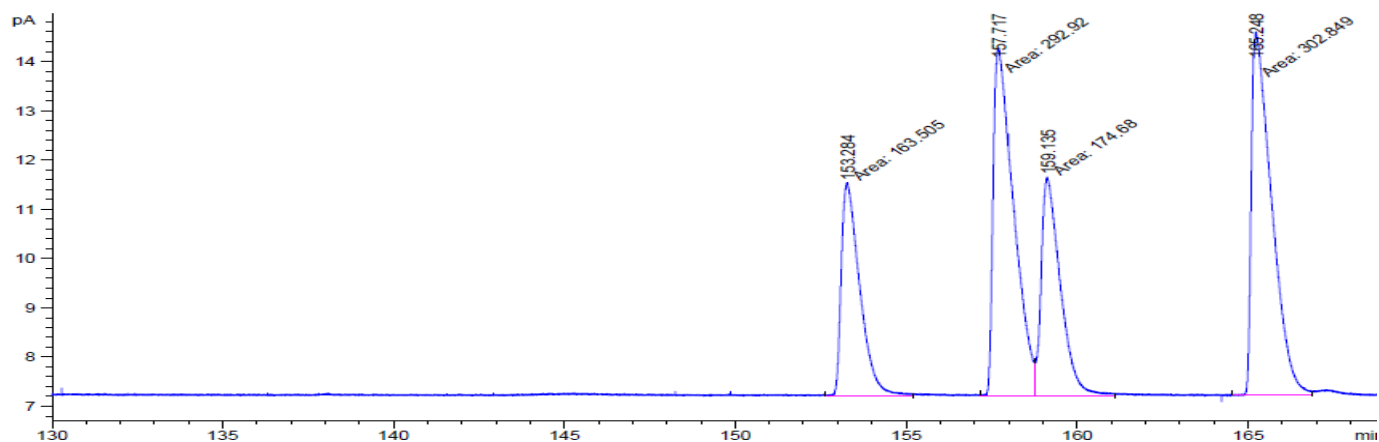

| Peak # | RetTime [min] | Type | Width [min] | Area [pA*s] | Height [pA] | Area %   |
|--------|---------------|------|-------------|-------------|-------------|----------|
| 1      | 153.284       | MM   | 0.6296      | 163.50467   | 4.32844     | 17.50671 |
| 2      | 157.717       | MM   | 0.6907      | 292.92029   | 7.06814     | 31.36345 |
| 3      | 159.135       | MM   | 0.6552      | 174.67986   | 4.44339     | 18.70326 |
| 4      | 165.248       | MM   | 0.6844      | 302.84937   | 7.37467     | 32.42658 |

### Alcohol:

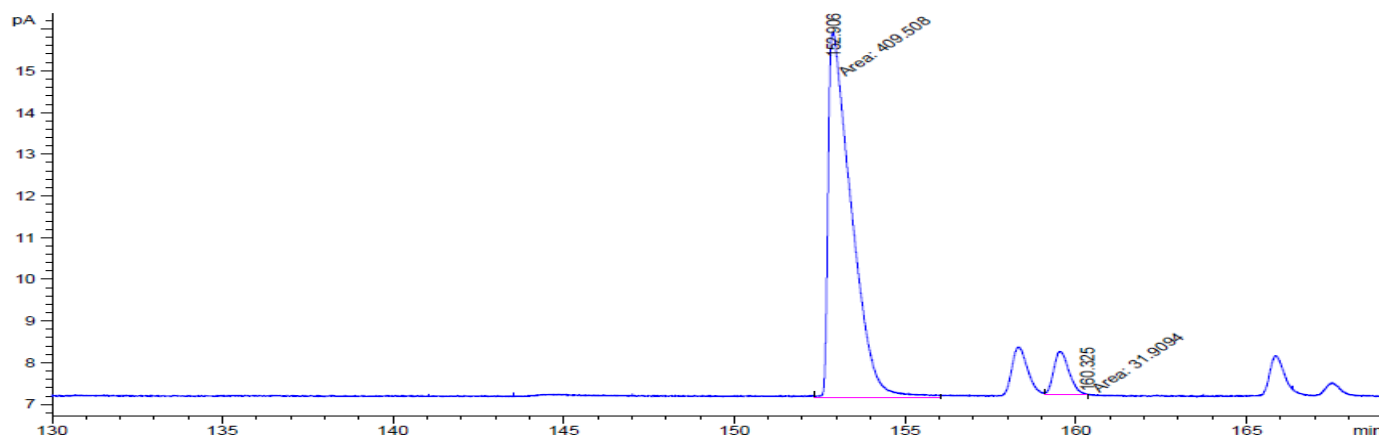

| Peak # | RetTime [min] | Type | Width [min] | Area [pA*s] | Height [pA] | Area %   |
|--------|---------------|------|-------------|-------------|-------------|----------|
| 1      | 152.906       | MM   | 0.7791      | 409.50766   | 8.75974     | 92.77114 |
| 2      | 160.325       | MM N | 0.0000      | 31.90941    | 5.93895e-3  | 7.22886  |

Aldehyde:

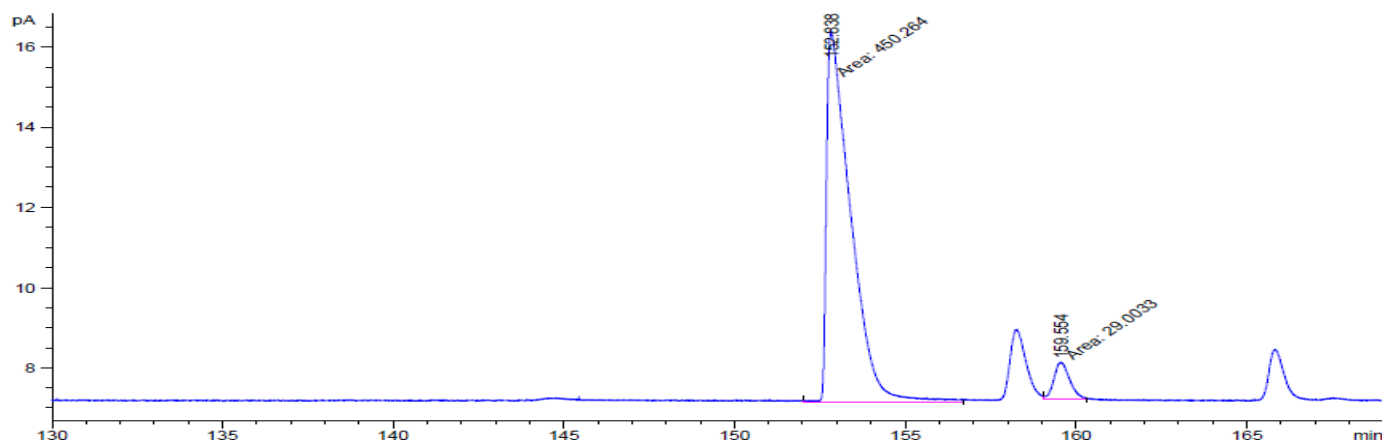

| Peak # | RetTime [min] | Type | Width [min] | Area [pA*s] | Height [pA] | Area %   |
|--------|---------------|------|-------------|-------------|-------------|----------|
| 1      | 152.838       | MM   | 0.8133      | 450.26407   | 9.22715     | 93.94842 |
| 2      | 159.554       | MM   | 0.5249      | 29.00325    | 9.20927e-1  | 6.05158  |

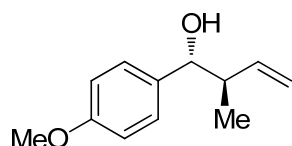

**(1R,2R)-1-(4-methoxyphenyl)-2-methylbut-3-en-1-ol**

**From Alcohol Oxidation Level:** To a resealable pressure tube (13 x 100 mm) equipped with a magnetic stir bar was added  $\text{RuH}_2(\text{CO})(\text{PPh}_3)_3$  (13.8 mg, 0.015 mmol, 5 mol%), dppf (8.3 mg, 0.015 mmol, 5 mol%), (*R*)-phosphoric acid **A<sub>9</sub>** (15.1 mg, 0.03 mmol, 10 mol%) and alcohol **1f** (37.2  $\mu\text{L}$ , 0.30 mmol, 100 mol%). The tube was sealed with a rubber septum and purged with nitrogen. Tetrahydrofuran (0.15 mL, 2.0 M concentration with respect to alcohol) was added and the solution was cooled to  $-78^\circ\text{C}$ . Butadiene (0.10 mL, 1.20 mmol, 400 mol%) was quickly added and the rubber septum was quickly replaced with a screw cap. The mixture was heated at  $95^\circ\text{C}$  (oil bath temperature) for 48 hrs, at which point the reaction mixture was allowed to cool to ambient temperature. The reaction mixture was concentrated *in vacuo* and purified by flash column chromatography ( $\text{SiO}_2$ ; 0-20% EtOAc/hexanes) to furnish the title compound (41.7 mg, 0.22 mmol, *anti:syn* = 6:1, 93:7 er) as a colorless oil in 72% yield.

**From Aldehyde Oxidation Level:** To a resealable pressure tube (13 x 100 mm) equipped with a magnetic stir bar was added  $\text{RuH}_2(\text{CO})(\text{PPh}_3)_3$  (13.8 mg, 0.015 mmol, 5 mol%), dppf (8.3 mg, 0.015 mmol, 5 mol%), (*R*)-phosphoric acid **A<sub>9</sub>** (15.1 mg, 0.03 mmol, 10 mol%) and aldehyde **2f** (36.5  $\mu\text{L}$ , 0.30 mmol, 100 mol%). The tube was sealed with a rubber septum and purged with nitrogen. Tetrahydrofuran (0.15 mL, 2.0 M concentration with respect to alcohol) and 1,4-butanediol (0.053 mL, 0.60 mmol, 200 mol%) were added and the solution was cooled to  $-78^\circ\text{C}$ . Butadiene (0.10 mL, 1.20 mmol, 400 mol%) was quickly added and the rubber septum was quickly replaced with a screw cap. The mixture was heated at  $95^\circ\text{C}$  (oil bath temperature) for 48 hrs, at which point the reaction mixture was allowed to cool to ambient temperature. The reaction mixture was concentrated *in vacuo* and purified by flash column chromatography ( $\text{SiO}_2$ ; 0-20% EtOAc/hexanes) to furnish the title compound (38.1 mg, 0.20 mmol, *anti:syn* = 6:1, 94:6 er) as a colorless oil in 66% yield.

**<sup>1</sup>H NMR** (400 MHz,  $\text{CDCl}_3$ ):  $\delta$  7.25 (d,  $J = 7.8$  Hz, 2H), 6.88 (d,  $J = 7.8$  Hz, 2H), 5.86-5.77 (m, 1H), 5.29-5.16 (m, 2H), 4.30 (d,  $J = 8.0$  Hz, 1H), 3.80 (s, 3H), 2.50-2.41 (m, 1H), 2.15 (s, 1H), 0.85 (d,  $J = 6.8$  Hz, 3H).

**<sup>13</sup>C NMR** (100 MHz,  $\text{CDCl}_3$ ):  $\delta$  159.1, 141.0, 134.6, 128.0, 116.7, 113.6, 77.5, 55.3, 46.4, 16.6 ppm.

**LRMS** (CI+).  $m/z$  193  $[\text{M}+\text{H}]^+$

$[\alpha]_{\text{D}}^{25} = +51.8$  ( $c = 1.0$ ,  $\text{CHCl}_3$ ).

**FTIR** (neat): 2961, 1611, 1510, 1458, 1302, 1260, 1173, 1032, 911, 731  $\text{cm}^{-1}$ .

**GC** Cyclosil-B: Initial temperature:  $50^\circ\text{C}$  (5 min hold);  $50$ - $115^\circ\text{C}$  rate: 0.5 C/min (20 min hold);  $115$ - $165^\circ\text{C}$ , rate: 0.475 C/min  $t_{\text{major}} = 184.9$  min,  $t_{\text{minor}} = 187.3$  min.

The spectroscopic properties of this compound were consistent with the data available in the literature (39).

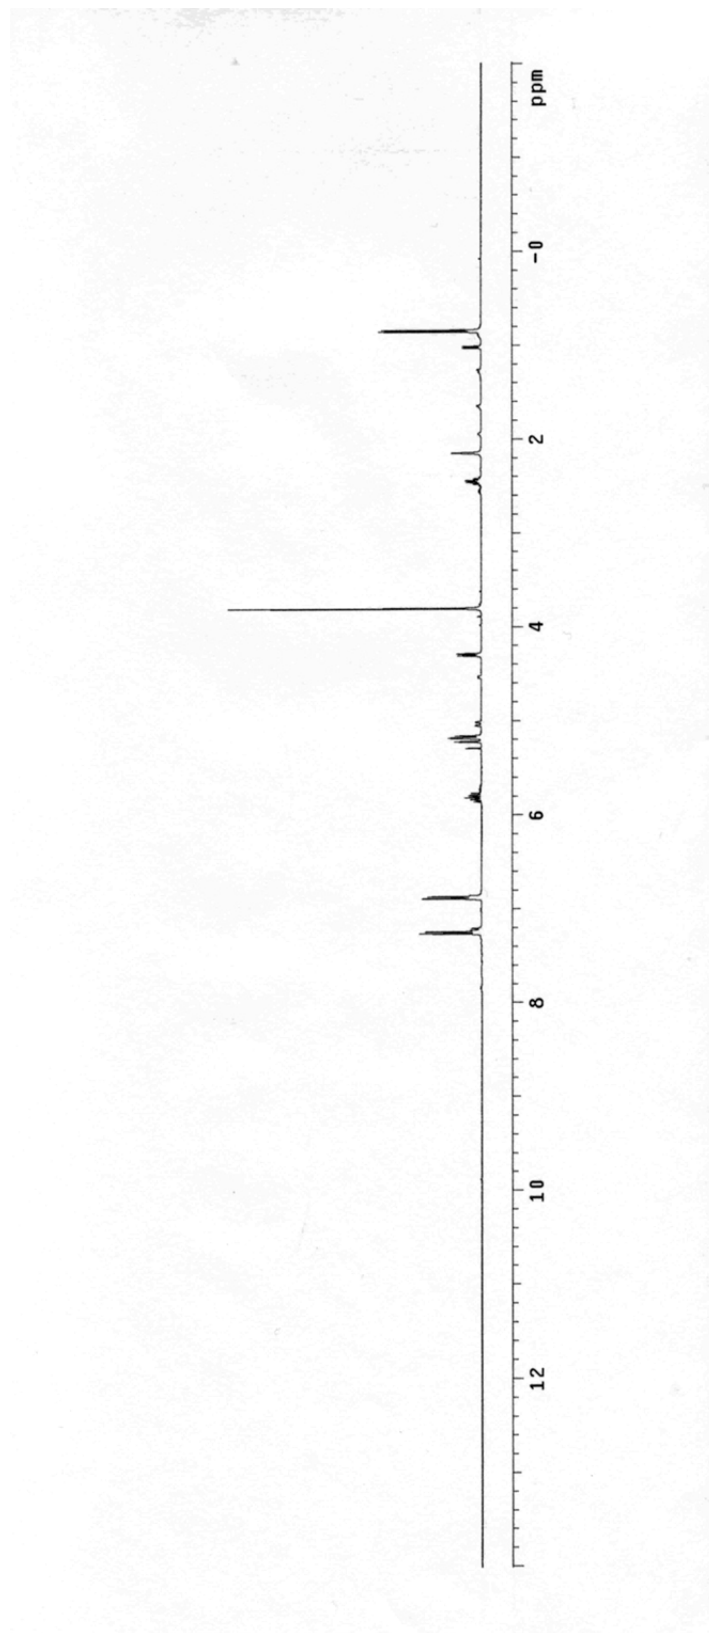

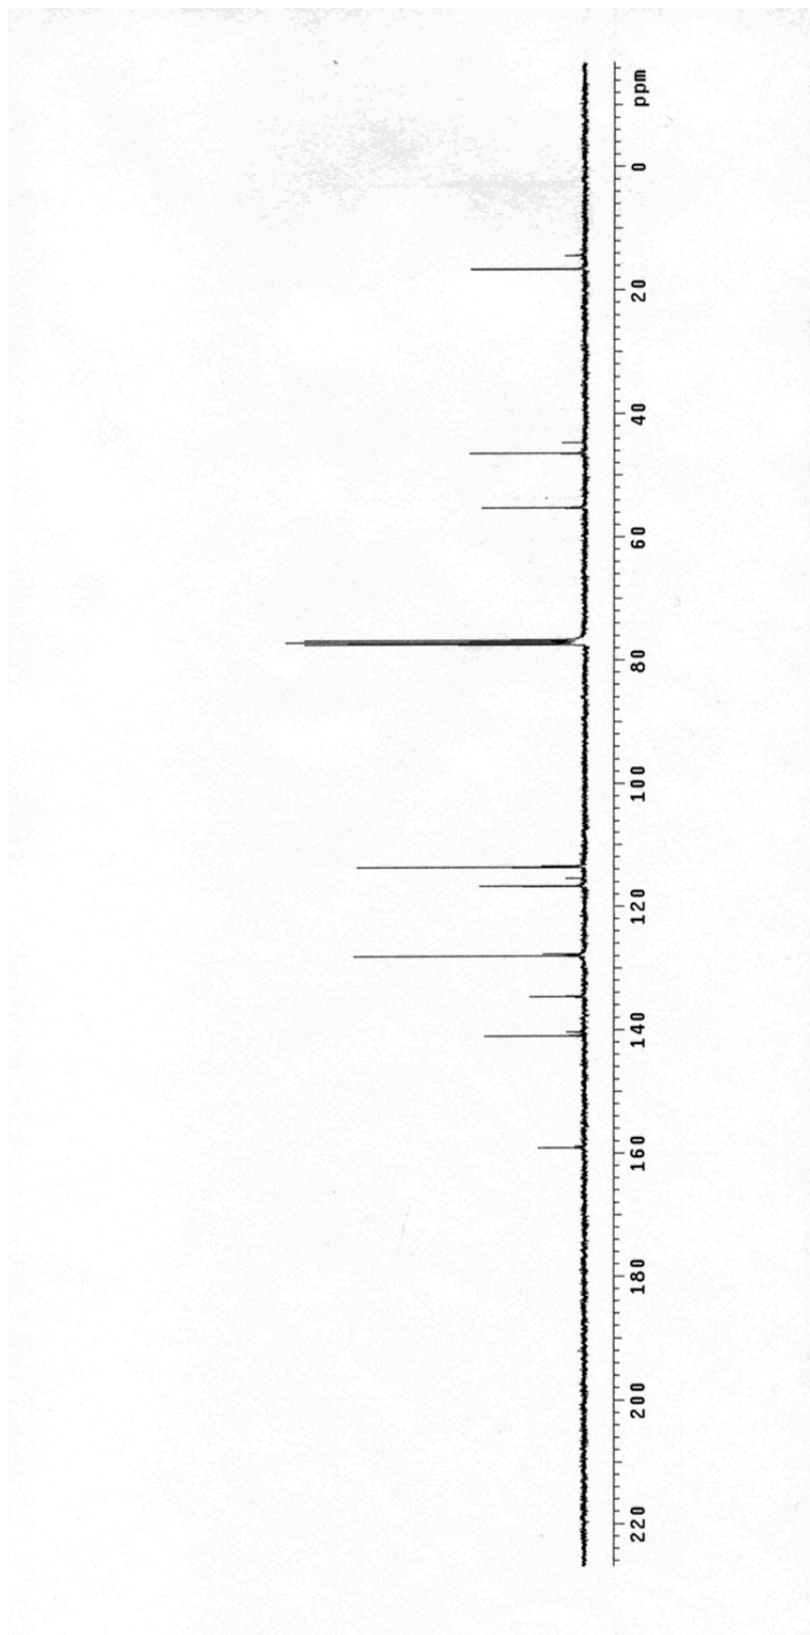

### Racemic:

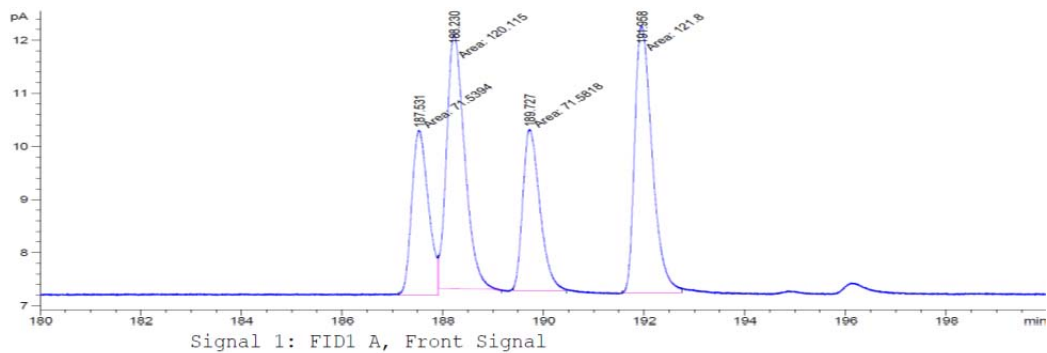

| Peak # | RetTime [min] | Type | Width [min] | Area [pA*s] | Height [pA] | Area %   |
|--------|---------------|------|-------------|-------------|-------------|----------|
| 1      | 187.531       | MM   | 0.3824      | 71.53935    | 3.11795     | 18.57991 |
| 2      | 188.230       | MM   | 0.4184      | 120.11469   | 4.78511     | 31.19569 |
| 3      | 189.727       | MM   | 0.3924      | 71.58181    | 3.03999     | 18.59093 |
| 4      | 191.958       | MM   | 0.4030      | 121.80028   | 5.03745     | 31.63347 |

### Alcohol:

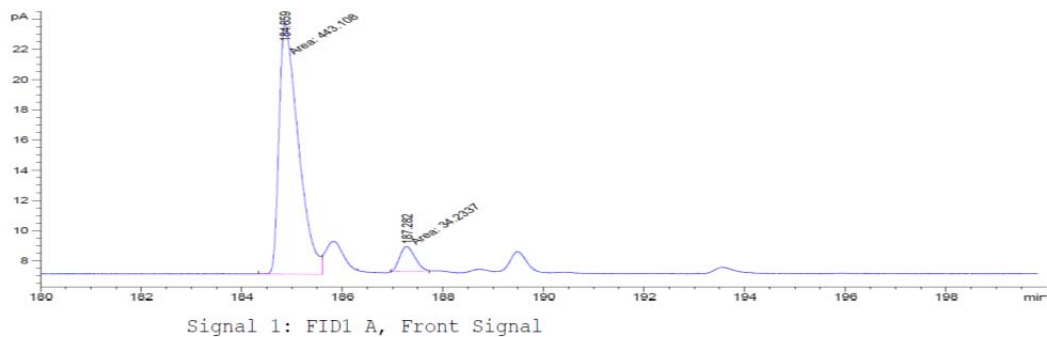

| Peak # | RetTime [min] | Type | Width [min] | Area [pA*s] | Height [pA] | Area %   |
|--------|---------------|------|-------------|-------------|-------------|----------|
| 1      | 184.859       | MM   | 0.4458      | 443.10831   | 16.56563    | 92.82827 |
| 2      | 187.282       | MM   | 0.3435      | 34.23370    | 1.66111     | 7.17173  |

Aldehyde:

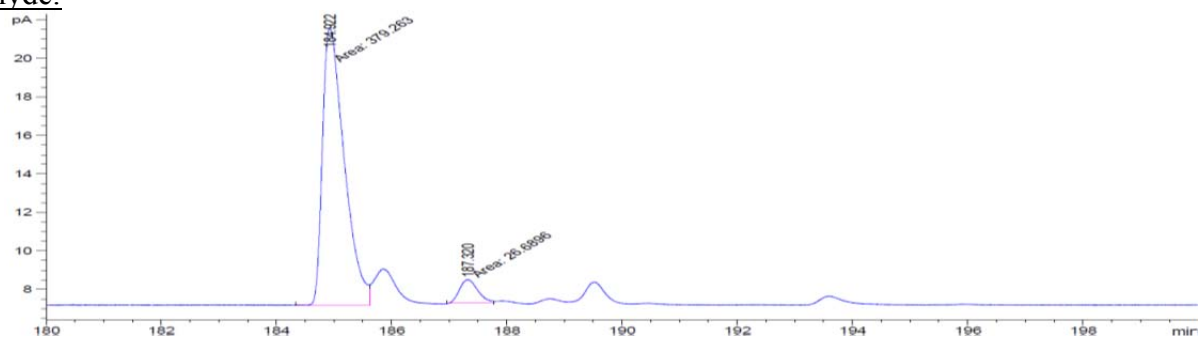

Signal 1: FID1 A, Front Signal

| Peak # | RetTime [min] | Type | Width [min] | Area [pA*s] | Height [pA] | Area %   |
|--------|---------------|------|-------------|-------------|-------------|----------|
| 1      | 184.922       | MM   | 0.4388      | 379.26254   | 14.40639    | 93.42543 |
| 2      | 187.320       | MM   | 0.3610      | 26.68959    | 1.23206     | 6.57457  |



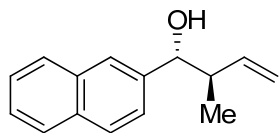

**(1R,2R)-2-methyl-1-(naphthalen-2-yl)but-3-en-1-ol (3g)**

**From Alcohol Oxidation Level:** To a resealable pressure tube (13 x 100 mm) equipped with a magnetic stir bar was added RuH<sub>2</sub>(CO)(PPh<sub>3</sub>)<sub>3</sub> (13.8 mg, 0.015 mmol, 5 mol%), dppf (8.3 mg, 0.015 mmol, 5 mol%), (*R*)-phosphoric acid **A**<sub>9</sub> (15.1 mg, 0.03 mmol, 10 mol%) and alcohol **1f** (47.2 mg, 0.30 mmol, 100 mol%). The tube was sealed with a rubber septum and purged with nitrogen. Tetrahydrofuran (0.15 mL, 2.0 M concentration with respect to alcohol) was added and the solution was cooled to -78°C. Butadiene (0.10 mL, 1.20 mmol, 400 mol%) was quickly added and the rubber septum was quickly replaced with a screw cap. The mixture was heated at 95°C (oil bath temperature) for 48 hrs, at which point the reaction mixture was allowed to cool to ambient temperature. The reaction mixture was concentrated *in vacuo* and purified by flash column chromatography (SiO<sub>2</sub>; 0-20% EtOAc/hexanes) to furnish the title compound (60.4 mg, 0.29 mmol, *anti:syn* = 9:1, 94:6 er) as a colorless oil in 95% yield.

**From Aldehyde Oxidation Level:** To a resealable pressure tube (13 x 100 mm) equipped with a magnetic stir bar was added RuH<sub>2</sub>(CO)(PPh<sub>3</sub>)<sub>3</sub> (13.8 mg, 0.015 mmol, 5 mol%), dppf (8.3 mg, 0.015 mmol, 5 mol%), (*R*)-phosphoric acid **A**<sub>9</sub> (15.1 mg, 0.03 mmol, 10 mol%) and aldehyde **2f** (46.8 mg, 0.30 mmol, 100 mol%). The tube was sealed with a rubber septum and purged with nitrogen. Tetrahydrofuran (0.15 mL, 2.0 M concentration with respect to alcohol) and 1,4-butanediol (0.053 mL, 0.60 mmol, 200 mol%) were added and the solution was cooled to -78°C. Butadiene (0.10 mL, 1.20 mmol, 400 mol%) was quickly added and the rubber septum was quickly replaced with a screw cap. The mixture was heated at 95°C (oil bath temperature) for 48 hrs, at which point the reaction mixture was allowed to cool to ambient temperature. The reaction mixture was concentrated *in vacuo* and purified by flash column chromatography (SiO<sub>2</sub>; 0-20% EtOAc/hexanes) to furnish the title compound (50.0 mg, 0.24 mmol, *anti:syn* = 4:1, 93:7 er) as a colorless oil in 79% yield.

**<sup>1</sup>H NMR** (400 MHz, CDCl<sub>3</sub>): δ 7.85-7.83 (m, 3H), 7.78 (s, 1H), 7.51-7.46 (m, 3H), 5.91-5.82 (m, 1H), 5.27-5.20 (m, 2H), 4.53 (dd, *J* = 8.0 Hz, 2.0 Hz, 1H), 2.65-2.56 (m, 1H), 2.32 (d, *J* = 2.0 Hz, 1H), 0.92 (d, *J* = 6.8 Hz, 3H).

**<sup>13</sup>C NMR** (100 MHz, CDCl<sub>3</sub>): δ 140.6, 139.9, 133.2, 133.1, 128.1, 128.0, 127.7, 126.1, 126.0, 125.8, 124.7, 117.0, 78.0, 46.2, 16.6 ppm.

**LRMS** (CI+). *m/z* 213 [M+H]<sup>+</sup>

[α]<sub>D</sub><sup>25</sup> = +57 (c = 1.0, CHCl<sub>3</sub>).

**FTIR** (neat): 3411, 3056, 2972, 2869, 2359, 1932, 1636, 1507, 1371, 1270, 1159, 1123, 1018, 908, 817, 731 cm<sup>-1</sup>

**HPLC** (Chiralcel AS-H/AS-H column, hexanes:*i*-PrOH = 95:5, 0.5 mL/min, 230 nm), *t*<sub>major</sub> = 74.2 min, *t*<sub>minor</sub> = 92.3 min.

The spectroscopic properties of this compound were consistent with the data available in the literature (40).

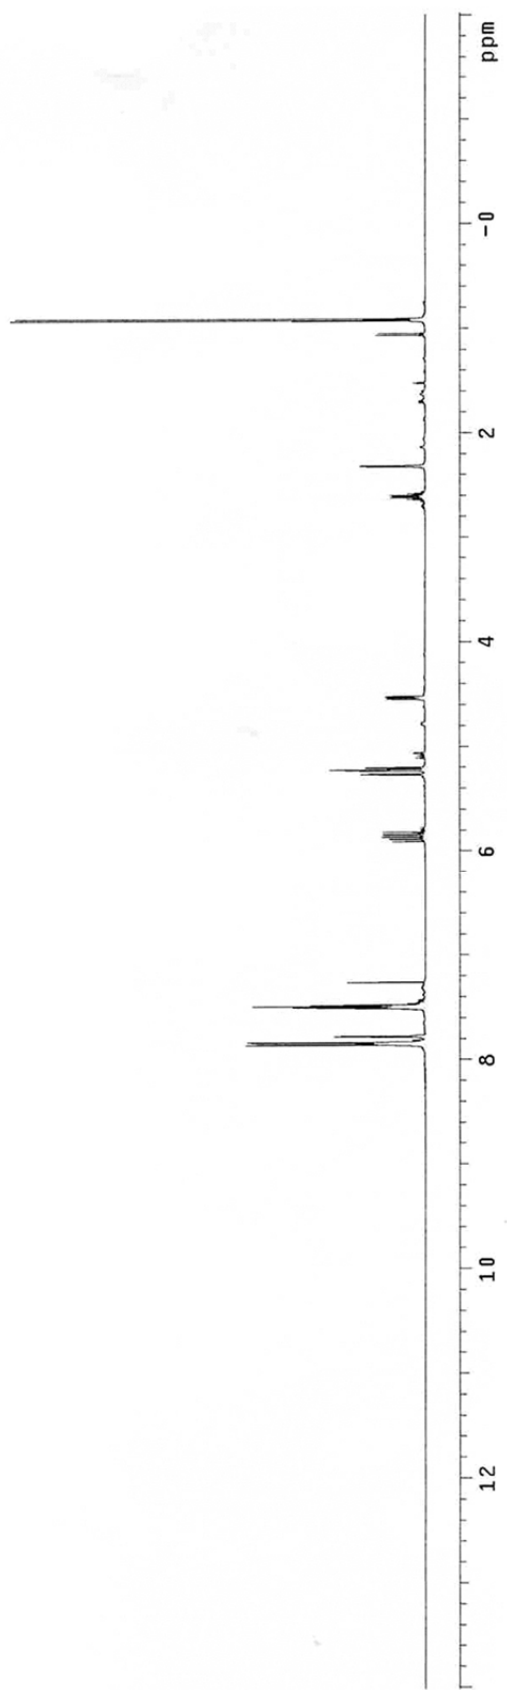

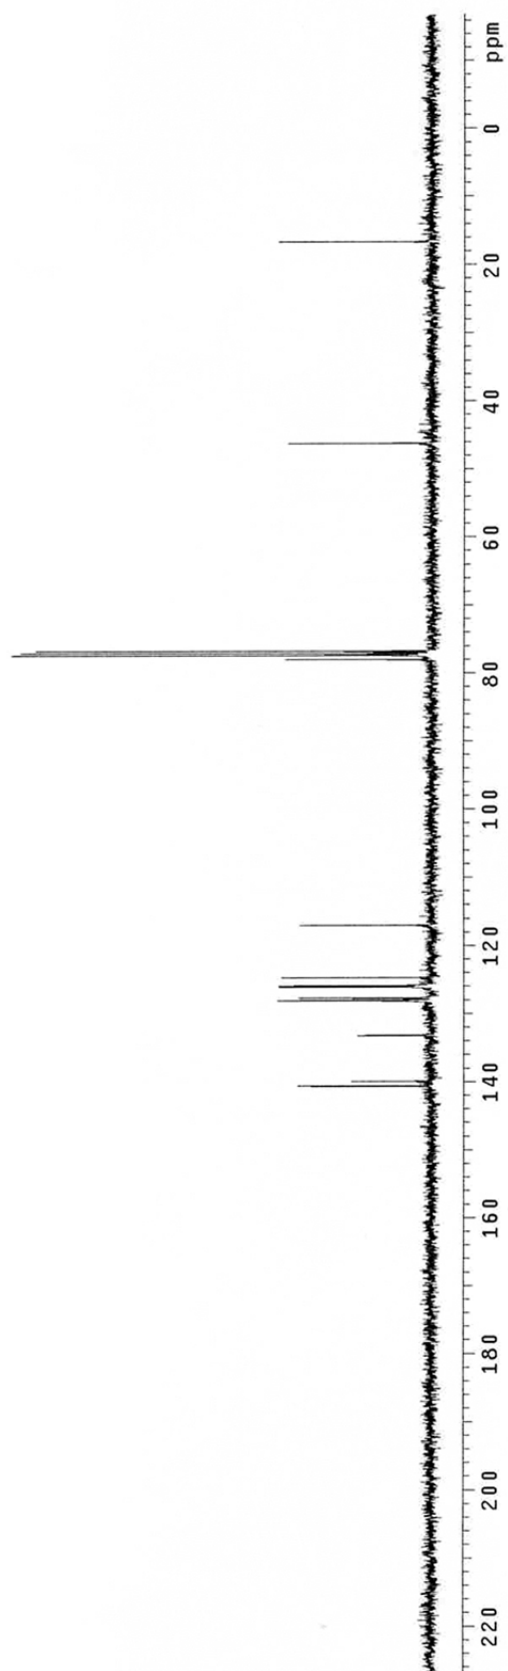

### Racemic:

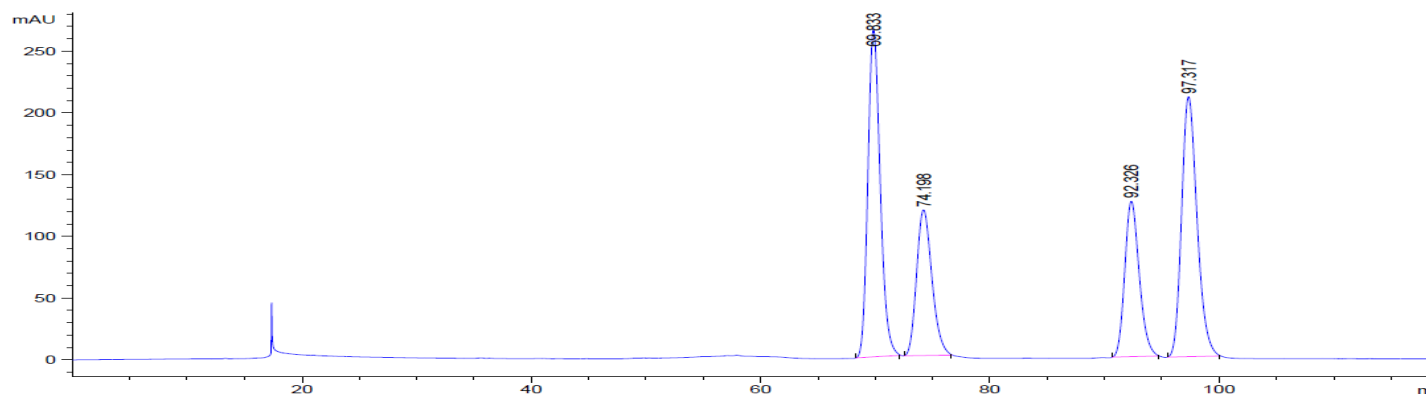

| Peak # | RetTime [min] | Type | Width [min] | Area [mAU*s] | Height [mAU] | Area %  |
|--------|---------------|------|-------------|--------------|--------------|---------|
| 1      | 69.833        | BB   | 1.1523      | 1.98477e4    | 265.46753    | 32.1878 |
| 2      | 74.198        | BB   | 1.4103      | 1.09874e4    | 118.00423    | 17.8187 |
| 3      | 92.326        | BB   | 1.3431      | 1.10806e4    | 126.10297    | 17.9699 |
| 4      | 97.317        | BB   | 1.4340      | 1.97466e4    | 210.59084    | 32.0237 |

### Alcohol:

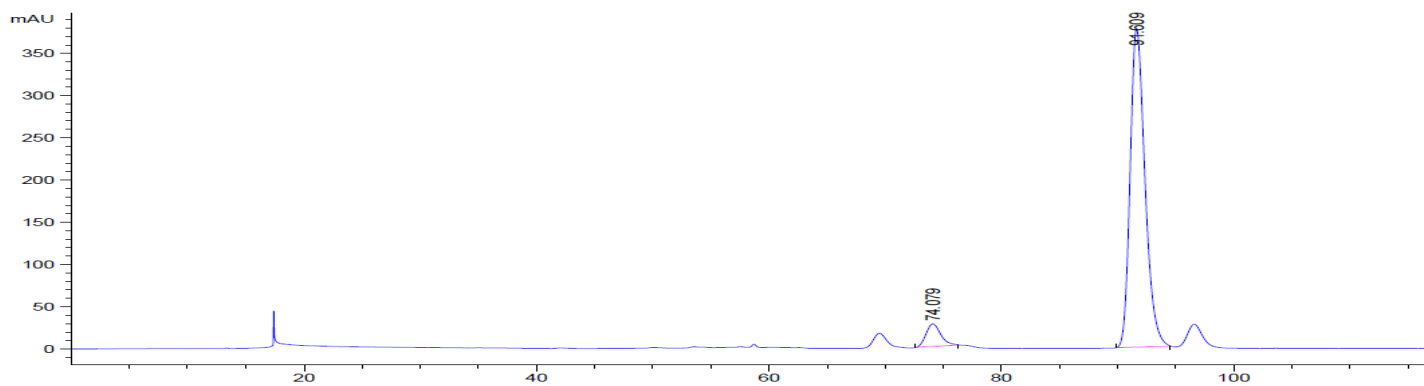

| Peak # | RetTime [min] | Type | Width [min] | Area [mAU*s] | Height [mAU] | Area %  |
|--------|---------------|------|-------------|--------------|--------------|---------|
| 1      | 74.079        | BB   | 1.2793      | 2362.48633   | 26.83085     | 6.5819  |
| 2      | 91.609        | BB   | 1.3594      | 3.35310e4    | 377.10840    | 93.4181 |

Aldehyde:

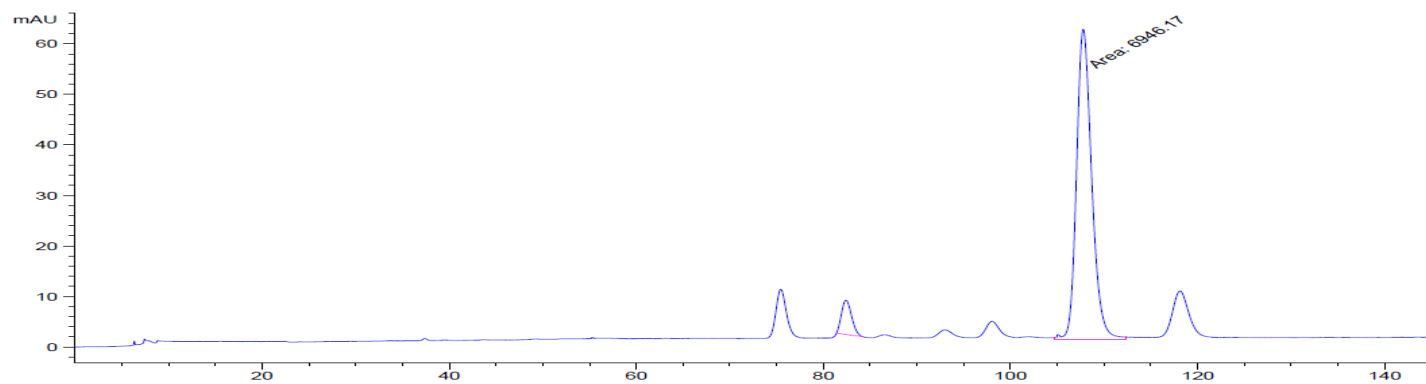

| Peak # | RetTime [min] | Type | Width [min] | Area [mAU*s] | Height [mAU] | Area %  |
|--------|---------------|------|-------------|--------------|--------------|---------|
| 1      | 82.392        | BB   | 0.9000      | 515.88885    | 6.83912      | 6.9135  |
| 2      | 107.752       | MM   | 1.8871      | 6946.17285   | 61.34930     | 93.0865 |

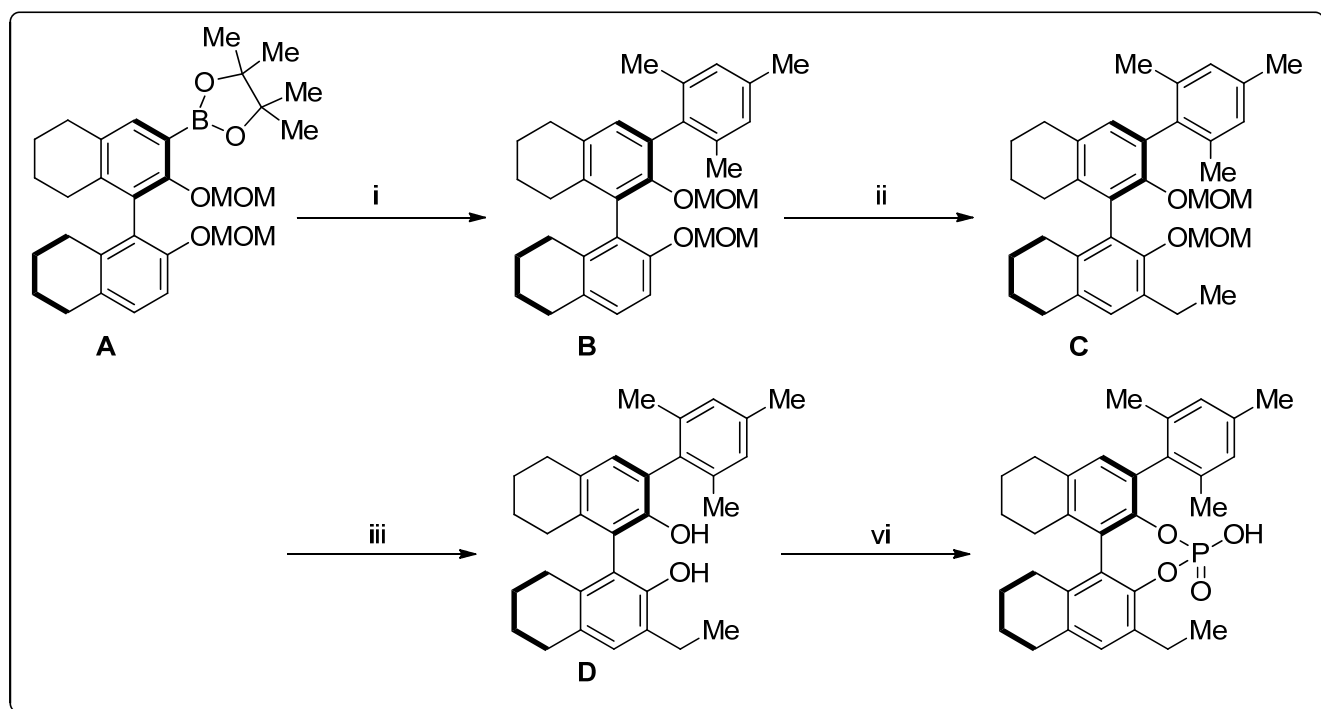

**Figure S1: Chiral Phosphoric Acid A<sub>9</sub> Synthetic Approach**

(i) Pd(PPh<sub>3</sub>)<sub>4</sub> (5 mol%), 2-bromomesitylene (300 mol%), NaOH (350 mol%), THF, H<sub>2</sub>O, 95 °C, 18hr.  
(ii) *n*-BuLi (150 mol%), iodoethane (150 mol%), THF, 18 hr. (iii) *conc.* HCl, EtOH, 18 hr. (vi) POCl<sub>3</sub> (130 mol%), pyridine, 115 °C, 18 hr then H<sub>2</sub>O, 115 °C, 3h.

**(R)-3-mesityl-2,2'-bis(methoxymethoxy)-5,5',6,6',7,7',8,8'-octahydro-1,1'-binaphthalene (B)**

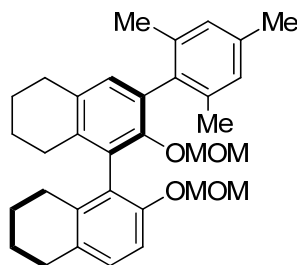

To a flame dried resealable pressure tube equipped with a magnetic stir bar was added compound **A** (3.72 g, 9.2 mmol, 100 mol%), Pd(PPh<sub>3</sub>)<sub>4</sub> (0.53 g, 0.46 mmol, 5 mol%), and NaOH (1.3 g, 32.2 mmol, 350 mol%). The tube was sealed with a rubber septum and purged with nitrogen. Tetrahydrofuran (46 mL, 0.2 M concentration with respect to compound **A**), water (18.4 mL, 0.5 M concentration with respect to compound **A**) and bromomesitylene (4.2 mL, 27.6 mmol, 300 mol%) were added. The solution was then vigorously degassed and the rubber septum quickly replaced with a screw cap. The mixture was heated at 95°C (oil bath temperature) for 18 hr, at which point the reaction mixture was allowed to cool to ambient temperature. The reaction mixture was transferred to separatory funnel and extracted with CH<sub>2</sub>Cl<sub>2</sub> (3x100 mL). The combined organic extracts were washed with brine, dried (Na<sub>2</sub>SO<sub>4</sub>), and concentrated *in vacuo*. The residue was purified by flash column chromatography (SiO<sub>2</sub>; ethyl acetate:hexanes, 1:15) to furnish the title compound (3.50 g, 7.2 mmol) as a white solid in 78% yield (41).

**m.p.:** 64-65 °C

**<sup>1</sup>H NMR** (400 MHz, CDCl<sub>3</sub>): δ 7.04 (d, *J* = 8.6 Hz, 1H), 6.99 (d, *J* = 8.6 Hz, 1H), 6.93 (s, 2H), 6.83 (s, 1H), 5.12 (d, *J* = 6.7 Hz, 1H), 5.06 (d, *J* = 6.7 Hz, 1H), 4.36 (d, *J* = 5.5 Hz, 1H), 4.24 (d, *J* = 5.5 Hz, 1H), 3.37 (s, 3H), 2.84-2.78 (m, 4H), 2.54 (s, 3H), 2.47-2.38 (m, 2H), 2.33 (s, 3H), 2.26-2.20 (m, 2H), 2.16 (s, 3H), 2.14 (s, 3H), 1.81-1.63 (m, 8H).

**<sup>13</sup>C NMR** (100 MHz, CDCl<sub>3</sub>): δ 152.5, 149.7, 137.1, 136.8, 136.7, 136.2, 136.0, 135.7, 132.9, 131.5, 131.3, 130.8, 130.7, 128.8, 127.9, 127.8, 127.1, 112.1, 97.7, 94.7, 55.6, 55.6, 29.6, 29.4, 27.5, 27.3, 23.3, 23.2, 23.1, 23.1, 21.1, 20.9, 20.8 ppm.

**LRMS** (CI+) *m/z* 500 [M]<sup>+</sup>.

**FTIR** (neat): 2922, 1478, 1244, 1206, 1060, 1016, 984, 922, 849, 807 cm<sup>-1</sup>.

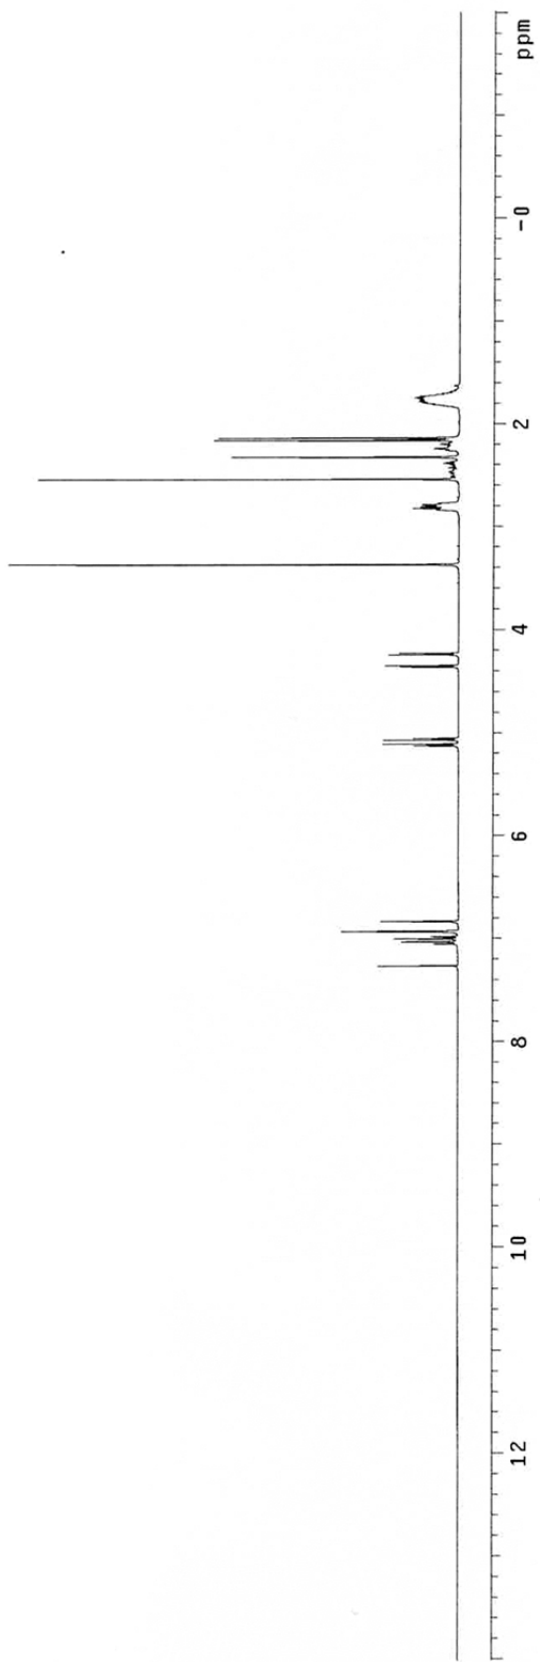



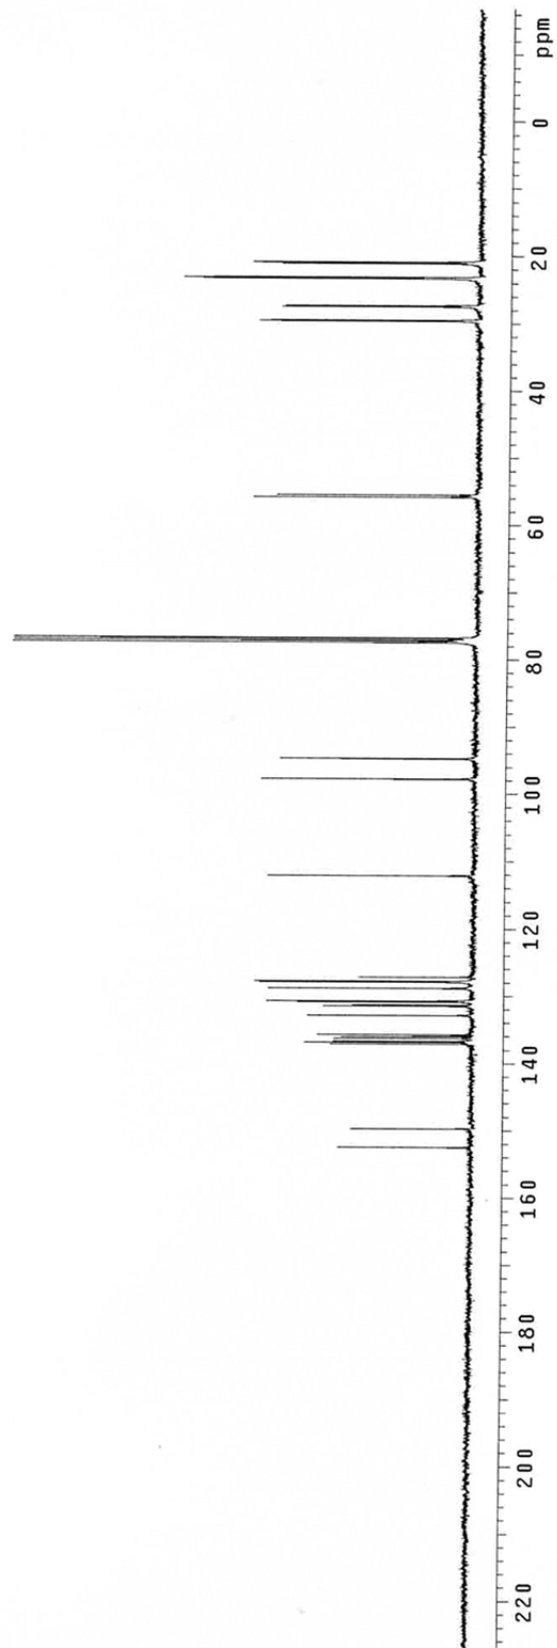

**(R)-3-ethyl-3'-mesityl-2,2'-bis(methoxymethoxy)-5,5',6,6',7,7',8,8'-octahydro-1,1'-binaphthalene**  
**(C)**

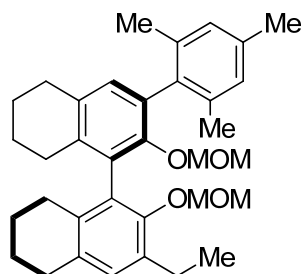

To a flame dried 100 mL round bottom flask compound **B** (1.70g, 3.4 mmol, 100 mol%) is added. The flask is sealed with a rubber septum and purged with nitrogen. Tetrahydrofuran (11 mL, 0.3 M concentration with respect to compound **B**) is added and the solution is cooled to 0°C. A solution of 2.5M *n*-BuLi in hexanes (2.0 mL, 5.1 mmol, 150 mol%) is added dropwise and stirred for 10 minutes. The reaction mixture is then allowed to warm to RT and stir for an additional 3 hrs. Iodoethane (0.4 mL, 5.1mmol, 150 mol%) is added dropwise and the mixture is stirred for 18 hrs. Upon complete consumption of starting material, as determined by TLC analysis, ammonium chloride (15 mL, sat. aq. sol.) was added. The organic layer was extracted with CH<sub>2</sub>Cl<sub>2</sub> (3x50 mL) and the combined organic extracts were dried (MgSO<sub>4</sub>), filtered, and concentrated *in vacuo*. The residue was purified by column chromatography (SiO<sub>2</sub>; diethylether:hexanes, 1:20) to provide the title compound (1.12 g, 2.1 mmol) as a white solid in 63% yield.

**m.p.:** 63-66 °C

**<sup>1</sup>H NMR** (400 MHz, CDCl<sub>3</sub>): δ 6.93 (s, 3H), 6.90 (s, 3H), 6.79 (s, 3H), 4.75 (d, *J* = 5.5 Hz, 1H), 4.67 (d, *J* = 5.5 Hz, 1H), 4.29 (d, *J* = 5.7 Hz, 1H), 4.27 (d, *J* = 5.7 Hz, 1H), 3.15 (s, 3H), 2.78-2.75 (m, 2H), 2.67 (q, *J* = 7.5 Hz, 2H), 2.52 (s, 3H), 2.48-2.39 (m, 2H), 2.30 (s, 3H), 2.30-2.18 (m, 2H), 2.11 (s, 3H), 2.09 (s, 3H), 1.78-1.69 (m, 8H), 1.23 (t, *J* = 7.5 Hz, 3H).

**<sup>13</sup>C NMR** (100 MHz, CDCl<sub>3</sub>): δ 150.8, 149.8, 136.7, 136.5, 136.4, 136.1, 135.9, 134.6, 134.0, 132.9, 131.1, 131.0, 130.9, 128.9, 128.0, 127.9, 98.5, 97.3, 56.5, 55.5, 31.6, 29.6, 29.6, 27.7, 27.4, 23.3, 23.2, 23.1, 22.9, 21.1, 20.9, 20.8, 14.9 ppm.

**LRMS** (CI+) *m/z* 528 [M]<sup>+</sup>.

**FTIR** (neat): 2926, 1711, 1437, 1359, 1280, 1095, 909 cm<sup>-1</sup>.

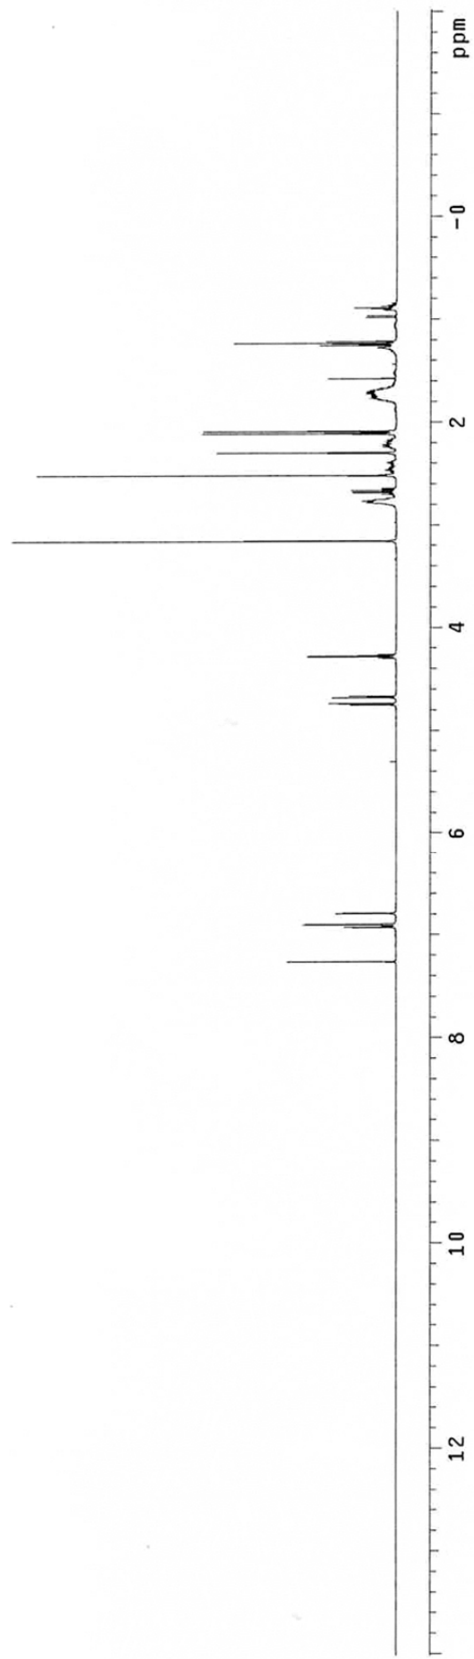

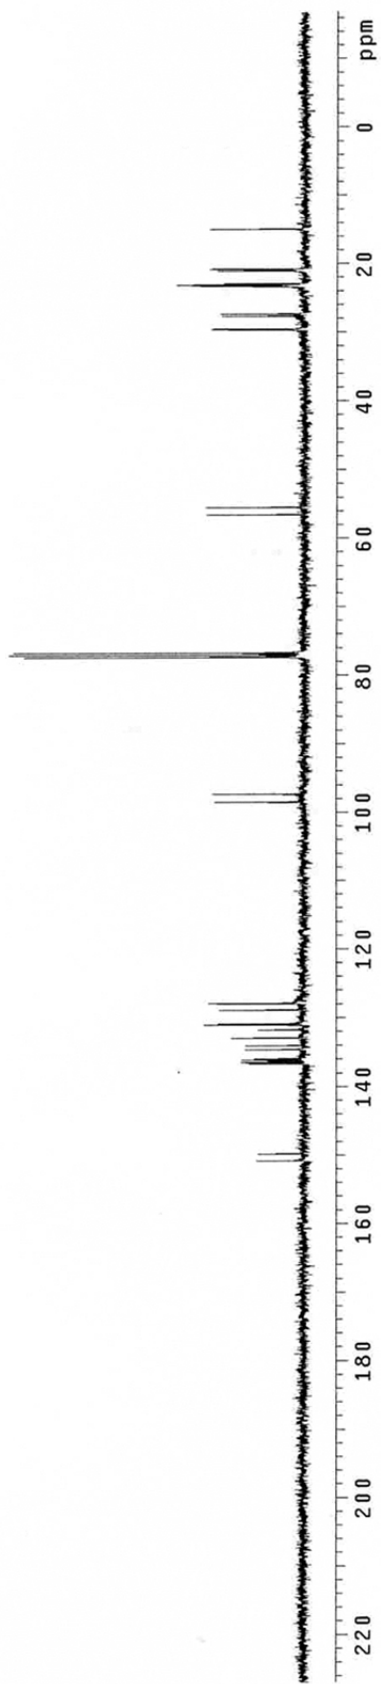

**(R)-3-ethyl-3'-mesityl-5,5',6,6',7,7',8,8'-octahydro-[1,1'-binaphthalene]-2,2'-diol (D)**

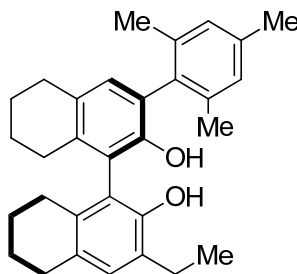

To a 250 mL round bottom flask compound **C** (1.12 g, 2.1 mmol, 100 mol%) is added. Ethanol (70 mL, 0.03 M concentration with respect to compound **C**) and *conc.* hydrochloric acid (7 mL, 0.3 M concentration with respect to compound **C**) were added sequentially. The reaction mixture is stirred at room temperature overnight. Upon complete consumption of starting material, as determined by TLC analysis, the reaction mixture is concentrated *in vacuo*. The residue was purified by column chromatography (SiO<sub>2</sub>; DCM:hexanes, 1:1) to provide the title compound (0.88 g, 2.0 mmol) as a white solid in 95% yield.

**m.p.:** 89-92 °C

**<sup>1</sup>H NMR** (400 MHz, CDCl<sub>3</sub>): δ 7.07 (s, 2H), 7.06 (s, 1H), 6.97 (s, 1H), 4.77 (s, 1H), 4.65 (s, 1H), 2.88 (q, *J* = 7.4 Hz, 2H), 2.81-2.75 (m, 4H), 2.52-2.31 (m, 7H), 2.20 (s, 3H), 2.19 (s, 3H), 1.91-1.73 (m, 8H), 1.37 (t, *J* = 7.4 Hz, 3H).

**<sup>13</sup>C NMR** (100 MHz, CDCl<sub>3</sub>): δ 148.8, 148.6, 137.2, 137.1, 137.0, 136.5, 133.8, 133.5, 131.7, 130.1, 130.0, 129.3, 128.5, 128.4, 127.7, 125.0, 119.9, 119.5, 31.7, 29.4, 27.2, 27.0, 23.4, 23.3, 23.2, 23.2, 22.8, 21.2, 20.7, 20.6, 14.2 ppm.

**LRMS** (CI+) *m/z* 440 [M]<sup>+</sup>.

**FTIR** (neat): 2926, 1450, 1264, 1154, 982, 736 cm<sup>-1</sup>.

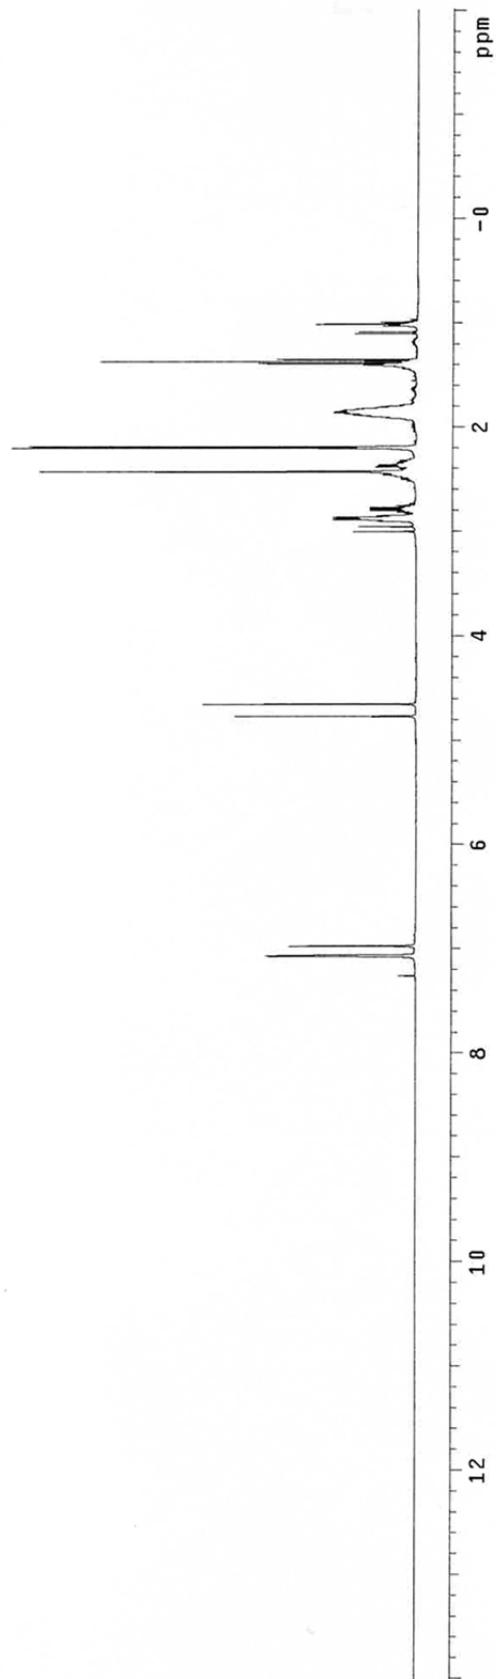

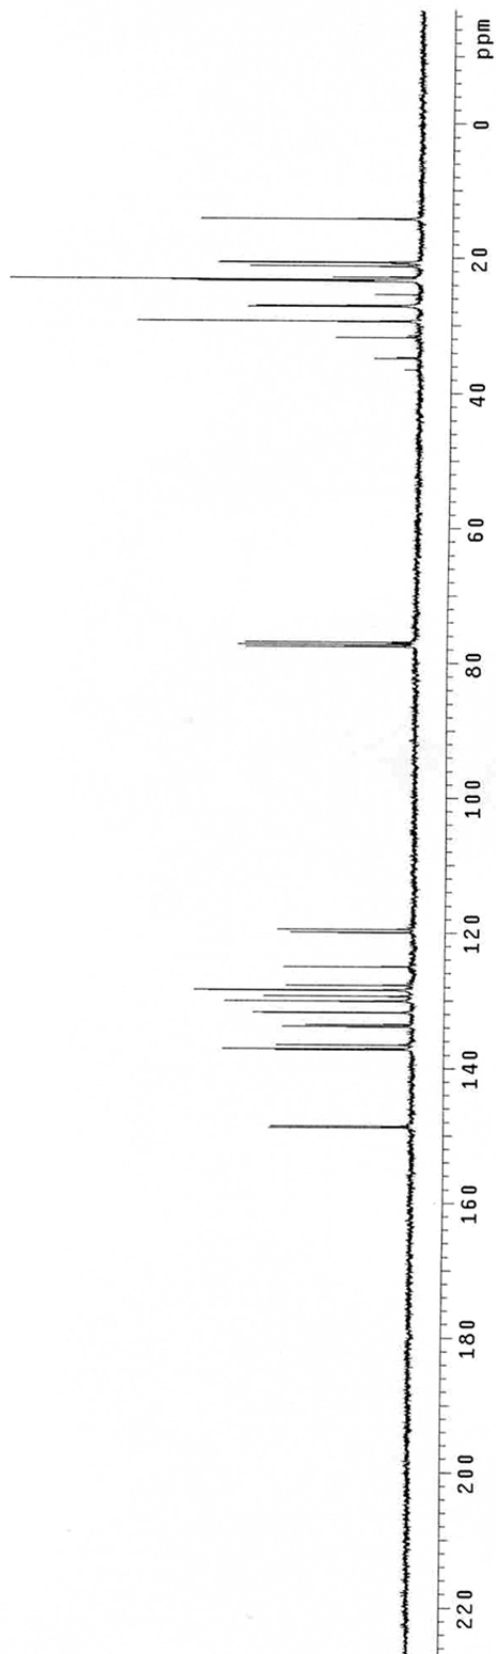

**(R)-2-ethyl-4-hydroxy-6-mesityl-8,9,10,11,12,13,14,15-octahydrodinaphtho[2,1-d:1',2'-f][1,3,2]dioxaphosphepine 4-oxide (A<sub>9</sub>)**

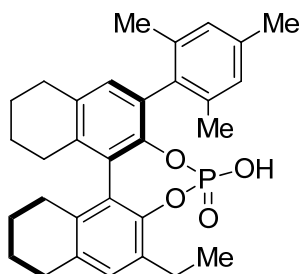

To a 100 mL round bottom flask equipped with a reflux condenser is added compound **D** (0.44g, 1 mmol, 100 mol%). Pyridine (2 mL, 0.5 M concentration with respect to compound **D**) and POCl<sub>3</sub> (.170 mL, 1.8 mmol, 180 mol%) were added to the reaction mixture. The mixture was heated at 115°C (oil bath temperature) for 18 hrs, at which point the reaction mixture was allowed to cool to ambient temperature. Water (1 mL, 1.0 M concentration with respect to compound **D**) was added dropwise and then heated to 115°C for an additional 3 hrs. Upon complete consumption of starting material, as determined by TLC analysis, the reaction mixture was cooled to ambient temperature and a solution of hydrochloric acid (10 mL, 3M aq. sol.) was added. The organic layer was extracted with CH<sub>2</sub>Cl<sub>2</sub> (3x50 mL) and the combined organic extracts were dried (MgSO<sub>4</sub>), filtered, and concentrated *in vacuo*. The residue was purified by column chromatography (SiO<sub>2</sub>; 0-20% IPA:CH<sub>2</sub>Cl<sub>2</sub>,) and concentrated *in vacuo*. The residue was diluted with CH<sub>2</sub>Cl<sub>2</sub> then washed with a solution of hydrochloric acid (10 mL, 3M aq. sol.) and concentrated *in vacuo* to provide the title compound (0.46 g, 0.92 mmol) as a white solid in 92% yield.

**m.p.:** 228-230 °C

**<sup>1</sup>H NMR** (400 MHz, CDCl<sub>3</sub>): δ 8.17 (brs, 1H), 6.90 (s, 1H), 6.84 (s, 1H), 6.76 (s, 1H), 2.81-2.69 (m, 4H), 2.66-2.55 (m, 3H), 2.49-2.42 (m, 1H), 2.27-2.12 (m, 2H), 2.10 (s, 3H), 2.05 (s, 3H), 1.88 (s, 3H), 1.79-1.66 (m, 8H), 1.11 (t, *J* = 7.5 Hz, 3H).

**<sup>13</sup>C NMR** (100 MHz, CDCl<sub>3</sub>): δ 144.1, 144.0, 143.5, 143.4, 136.9, 136.8, 136.5, 135.1, 135.0, 133.3, 132.8, 131.6, 130.2, 129.7, 128.5, 127.6, 126.7, 126.2, 29.3, 29.2, 27.8, 27.7, 22.8, 22.7, 22.7, 22.6, 22.3, 21.0, 20.8, 20.2, 14.0 ppm.

**<sup>31</sup>P NMR** (162 MHz, CDCl<sub>3</sub>): 2.5 ppm.

**LRMS** (CI+) *m/z* 502 [M]<sup>+</sup>.

**FTIR** (neat): 2931, 1612, 1434, 1245, 1202, 1017, 905, 728 cm<sup>-1</sup>.



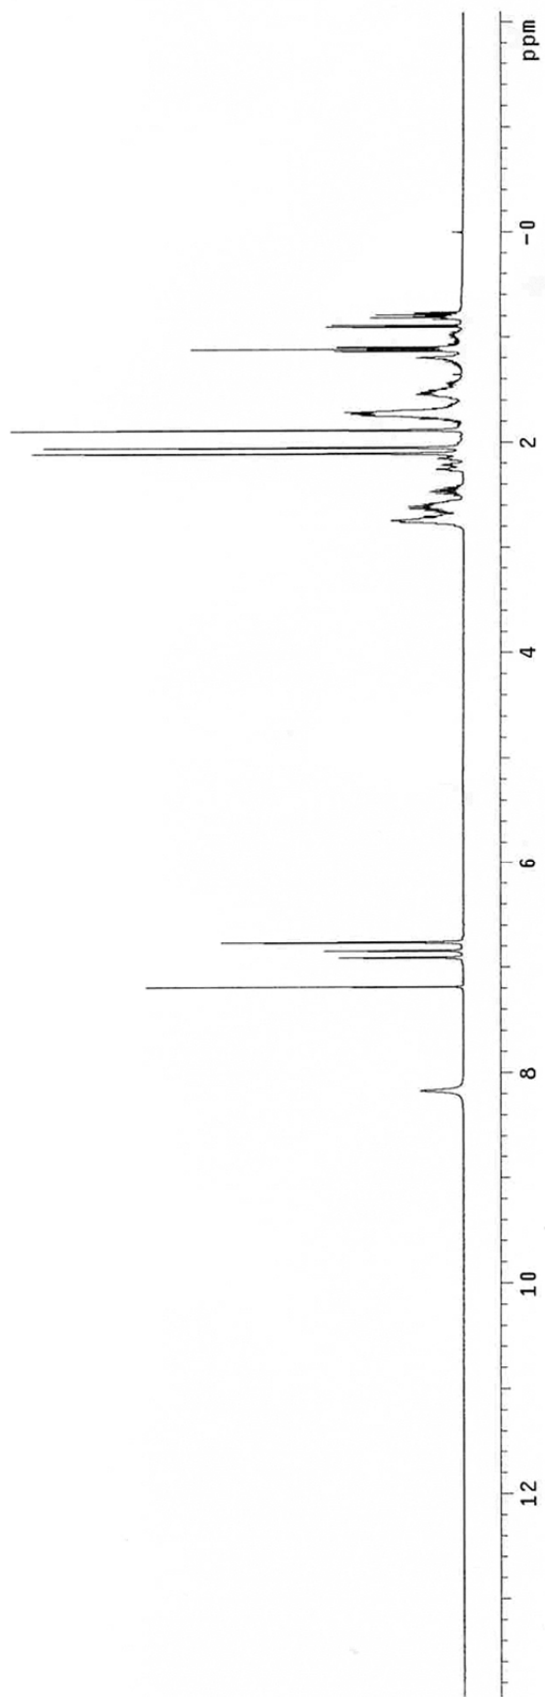

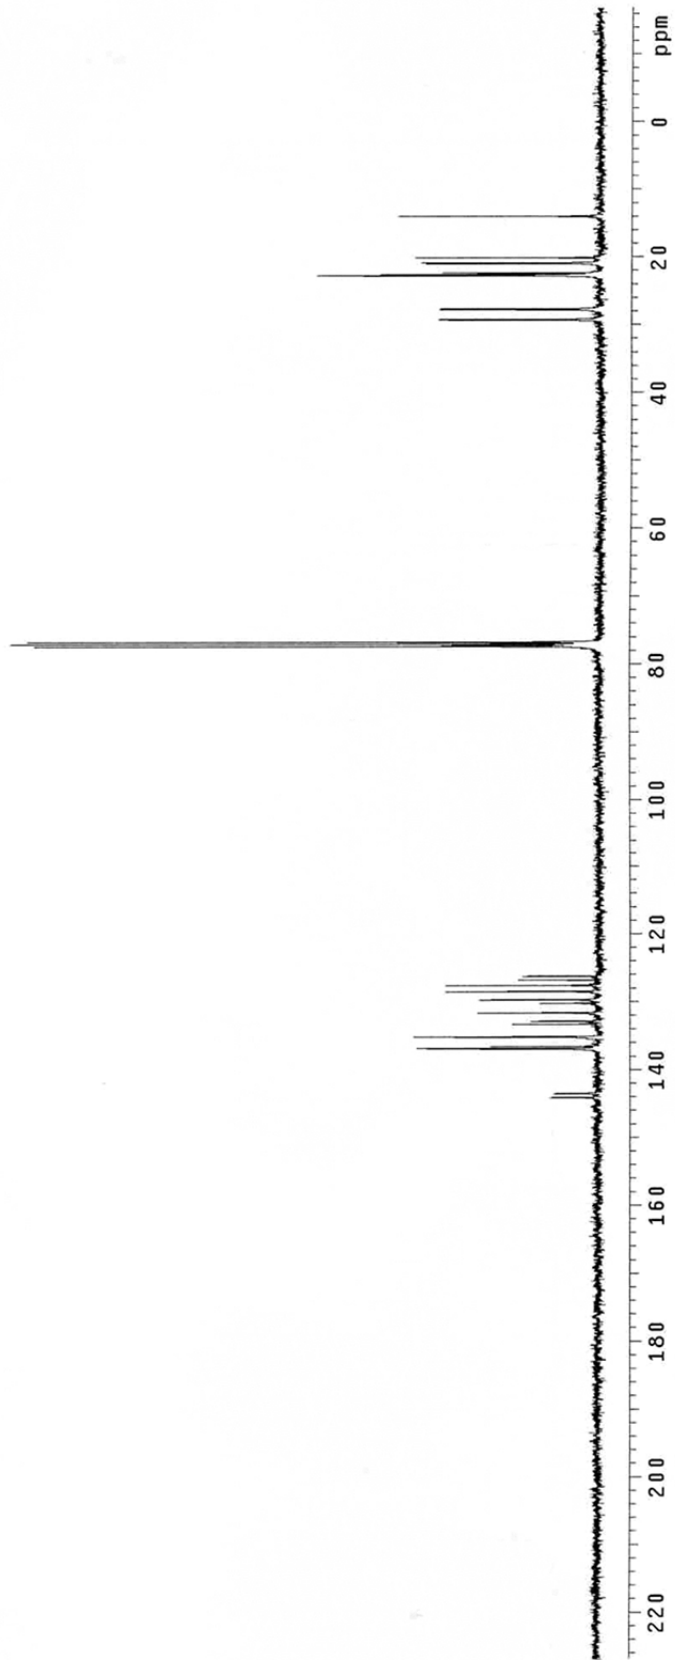

## Optimization of (*R*)-BINOL phosphoric acids.

**Table S1.**

Evaluation of 3,3'-disubstituted (*R*)-BINOL phosphoric acids

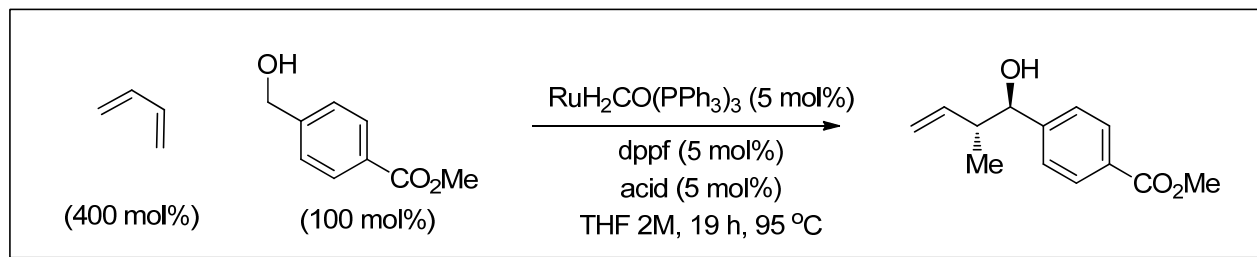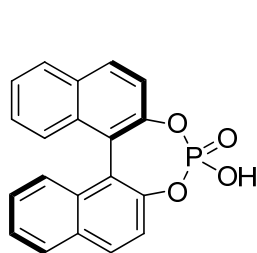

45% Yield  
1:1 dr  
4% ee

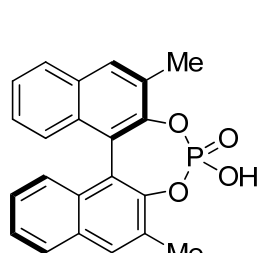

48% Yield  
2:1 dr  
33% ee

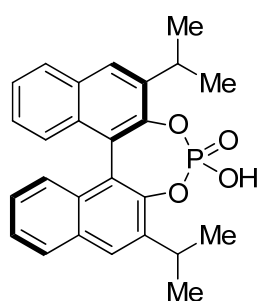

83% Yield  
1:2 dr  
15% ee

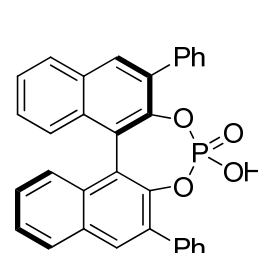

91% Yield  
5:1 dr  
14% ee

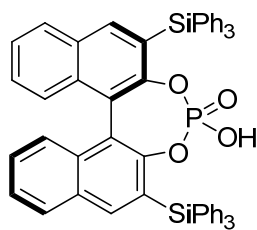

61% Yield  
1:1 dr  
6% ee

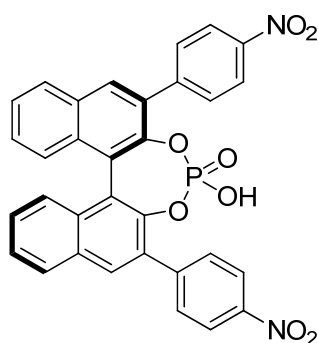

80% Yield  
1:1 dr  
9% ee

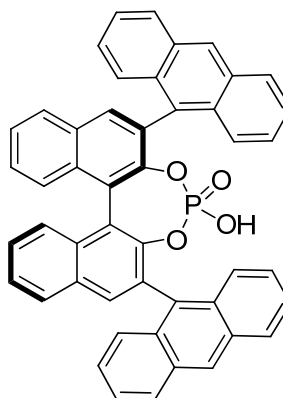

82% Yield  
1:1 dr  
10% ee

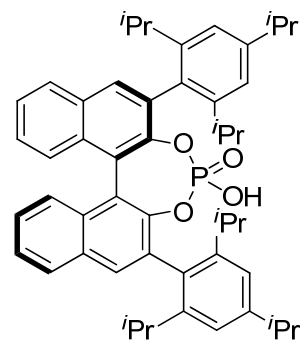

60% Yield  
1:1 dr  
0% ee

**Table S2.**Evaluation of mono-substituted (*R*)-BINOL phosphoric acids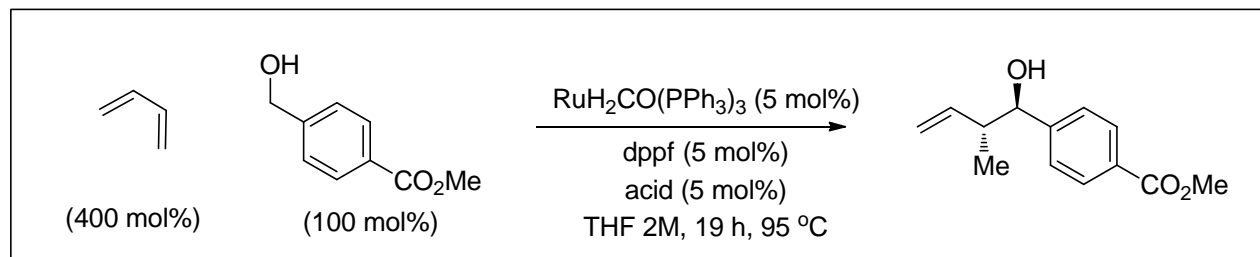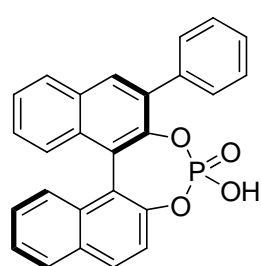

83% Yield  
2:1 dr  
37% ee

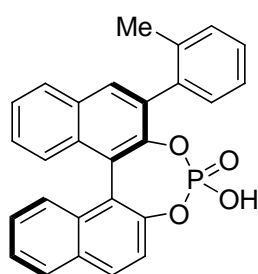

38% Yield  
1:1 dr  
21% ee

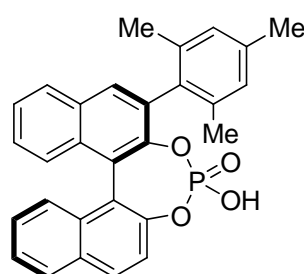

84% Yield  
3:1 dr  
73% ee

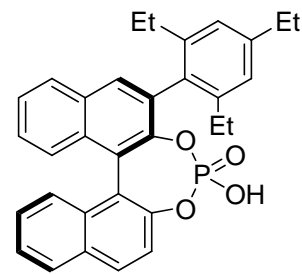

18% Yield  
2:1 dr  
54% ee

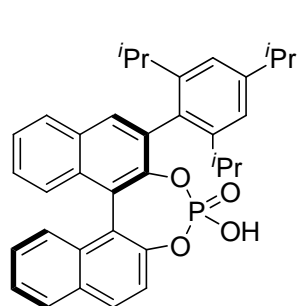

41% Yield  
2:1 dr  
62% ee

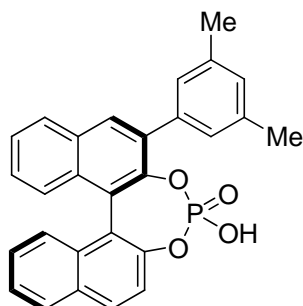

18% Yield  
2:1 dr  
30% ee

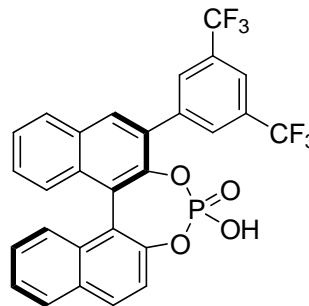

15% Yield  
1:1 dr  
15% ee

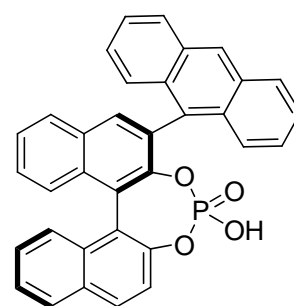

36% Yield  
2:1 dr  
60% ee

**Table S3.**

Evaluation of acid loading of various 3'-substituted,3-mesityl-(*R*)-BINOL phosphoric acids

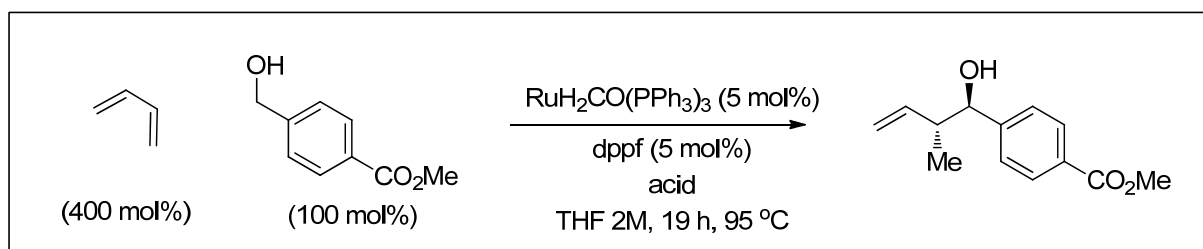

|                         |                                 |                                 |                                 |
|-------------------------|---------------------------------|---------------------------------|---------------------------------|
|                         |                                 |                                 |                                 |
| <b>5 mol%<br/>acid</b>  | 15% Yield<br>6 : 1 dr<br>71% ee | 21% Yield<br>5 : 1 dr<br>71% ee |                                 |
| <b>10 mol%<br/>acid</b> | 23% Yield<br>6 : 1 dr<br>78% ee | 33% Yield<br>8 : 1 dr<br>84% ee | 41% Yield<br>4 : 1 dr<br>72% ee |
|                         |                                 |                                 | 33% Yield<br>7 : 1 dr<br>76% ee |

**Table S4.**Evaluation of different substituent of (*R*)-3,3'-disubstituted (*R*)-H<sub>8</sub>-BINOL phosphoric acids derivatives.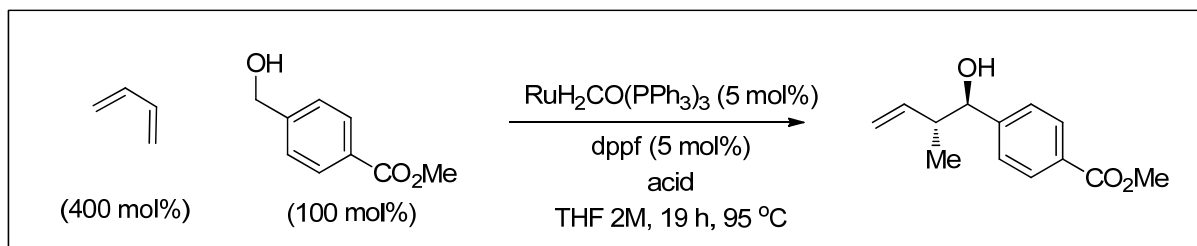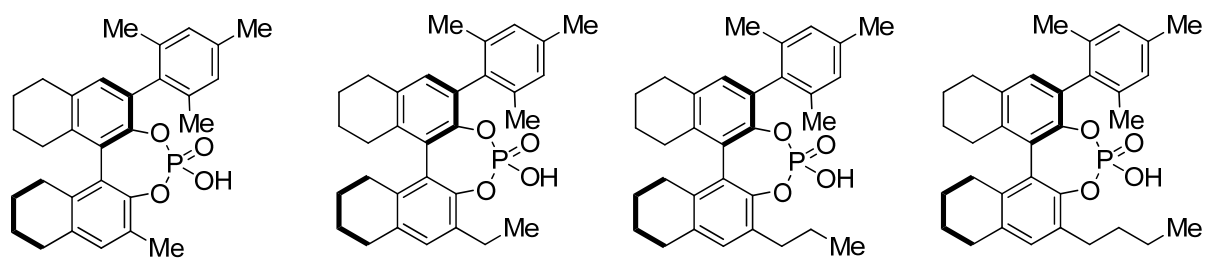

**5 mol%  
acid** 15% Yield  
5 : 1 dr  
72% ee

45% Yield  
3 : 1 dr  
78% ee

45% Yield  
5 : 1 dr  
71% ee

36% Yield  
5 : 1 dr  
75% ee

**10 mol%  
acid** 53% Yield  
8 : 1 dr  
84% ee

**50% Yield**  
**8 : 1 dr**  
**87% ee**

32% Yield  
6 : 1 dr  
83% ee

50% Yield  
6 : 1 dr  
83% ee

## References and Notes

1. M. Butters *et al.*, Critical assessment of pharmaceutical processes - a rationale for changing the synthetic route. *Chem. Rev.* **106**, 3002 (2006). [doi:10.1021/cr050982w](https://doi.org/10.1021/cr050982w)
2. R. A. Sheldon, E. The, Factor: Fifteen years on. *Green Chem.* **9**, 1273 (2007). [doi:10.1039/b713736m](https://doi.org/10.1039/b713736m)
3. C. A. Busacca, D. R. Fandrick, J. J. Song, C. H. senanayake, the growing impact of catalysis in the pharmaceutical industry. *Adv. Synth. Catal.* **353**, 1825 (2011). [doi:10.1002/adsc.201100488](https://doi.org/10.1002/adsc.201100488)
4. J. Magano, J. R. Dunetz, Large-scale applications of transition metal-catalyzed couplings for the synthesis of pharmaceuticals. *Chem. Rev.* **111**, 2177 (2011). [doi:10.1021/cr100346g](https://doi.org/10.1021/cr100346g)
5. C. D. Frohning, C. W. Kohlpaintner, in *Applied Homogeneous Catalysis with Organometallic Compounds*, B. Cornils, W. A. Herrmann, Eds. (Wiley-VCH, Weinheim, 1996) pp. 29–104.
6. P. W. N. M. van Leeuwen, in *Homogeneous Catalysis: Understanding the Art* (Kluwer, Dordrecht, 2004).
7. J. F. Bower, M. J. Krische, Formation of C–C bonds via iridium-catalyzed hydrogenation and transfer hydrogenation. *Top. Organomet. Chem.* **34**, 107 (2011).
8. A. Hassan, M. J. Krische, Unlocking hydrogenation for C–C bond formation: A brief overview of enantioselective methods. *Org. Process Res. Dev.* **15**, 1236 (2011). [doi:10.1021/op200195m](https://doi.org/10.1021/op200195m)
9. I. S. Kim, S. B. Han, M. J. Krische, *anti*-Diastereo- and enantioselective carbonyl crotylation from the alcohol or aldehyde oxidation level employing a cyclometallated iridium catalyst:  $\alpha$ -Methyl allyl acetate as a surrogate to preformed crotylmetal reagents. *J. Am. Chem. Soc.* **131**, 2514 (2009). [doi:10.1021/ja808857w](https://doi.org/10.1021/ja808857w)
10. X. Gao, I. A. Townsend, M. J. Krische, Enhanced anti-diastereo- and enantioselectivity in alcohol-mediated carbonyl crotylation using an isolable single component iridium catalyst. *J. Org. Chem.* **76**, 2350 (2011). [doi:10.1021/jo200068q](https://doi.org/10.1021/jo200068q)
11. X. Gao, H. Han, M. J. Krische, Direct generation of acyclic polypropionate stereopolyads via double diastereo- and enantioselective iridium-catalyzed crotylation of 1,3-diols: Beyond stepwise carbonyl addition in polyketide construction. *J. Am. Chem. Soc.* **133**, 12795 (2011). [doi:10.1021/ja204570w](https://doi.org/10.1021/ja204570w)
12. J. R. Zbieg, T. Fukuzumi, M. J. Krische, Iridium-catalyzed hydrohydroxyalkylation of butadiene: Carbonyl crotylation. *Adv. Synth. Catal.* **352**, 2416 (2010). [doi:10.1002/adsc.201000599](https://doi.org/10.1002/adsc.201000599)
13. F. Shibahara, J. F. Bower, M. J. Krische, Ruthenium-catalyzed C–C bond forming transfer hydrogenation: Carbonyl allylation from the alcohol or aldehyde oxidation level employing acyclic 1,3-dienes as surrogates to preformed allyl metal reagents. *J. Am. Chem. Soc.* **130**, 6338 (2008). [doi:10.1021/ja801213x](https://doi.org/10.1021/ja801213x)
14. J. R. Zbieg, J. Moran, M. J. Krische, Diastereo- and enantioselective ruthenium-catalyzed hydrohydroxy-alkylation of 2-silyl-butadienes: Carbonyl syn-crotylation from the alcohol oxidation level. *J. Am. Chem. Soc.* **133**, 10582 (2011). [doi:10.1021/ja2046028](https://doi.org/10.1021/ja2046028)
15. H. Alper, N. Hamel, Asymmetric synthesis of acids by the palladium-catalyzed hydrocarboxylation of olefins in the presence of (R)-(-)- or (S)-(+)-1,1'-binaphthyl-2,2'-diyl hydrogen phosphate. *J. Am. Chem. Soc.* **112**, 2803 (1990). [doi:10.1021/ja00163a053](https://doi.org/10.1021/ja00163a053)

16. V. Komanduri, M. J. Krische, Enantioselective reductive coupling of 1,3-enynes to heterocyclic aromatic aldehydes and ketones via rhodium-catalyzed asymmetric hydrogenation: Mechanistic insight into the role of brønsted acid additives. *J. Am. Chem. Soc.* **128**, 16448 (2006). [doi:10.1021/ja0673027](https://doi.org/10.1021/ja0673027)
17. G. L. Hamilton, E. J. Kang, M. Mba, F. D. Toste, A powerful chiral counterion strategy for asymmetric transition metal catalysis. *Science* **317**, 496 (2007). [doi:10.1126/science.1145229](https://doi.org/10.1126/science.1145229)
18. M. Rueping, A. P. Antonchick, C. Brinkmann, Dual catalysis: A combined enantioselective brønsted acid and metal-catalyzed reaction—metal catalysis with chiral counterions. *Angew. Chem. Int. Ed.* **46**, 6903 (2007). [doi:10.1002/anie.200702439](https://doi.org/10.1002/anie.200702439)
19. S. Mukherjee, B. List, Chiral counteranions in asymmetric transition-metal catalysis: Highly enantioselective Pd/Brønsted acid-catalyzed direct  $\alpha$ -allylation of aldehydes. *J. Am. Chem. Soc.* **129**, 11336 (2007). [doi:10.1021/ja074678r](https://doi.org/10.1021/ja074678r)
20. S. Liao, B. List, Asymmetric counteranion-directed transition-metal catalysis: Enantioselective epoxidation of alkenes with manganese(III) salen phosphate complexes. *Angew. Chem. Int. Ed.* **49**, 628 (2010). [doi:10.1002/anie.200905332](https://doi.org/10.1002/anie.200905332)
21. G. Jiang, B. List, Enantioselective hydrovinylation via asymmetric counteranion-directed ruthenium catalysis. *Chem. Commun. (Camb.)* **47**, 10022 (2011). [doi:10.1039/c1cc12499d](https://doi.org/10.1039/c1cc12499d)
22. B. Xu, S.-F. Zhu, X.-L. Xie, J.-J. Shen, Q.-L. Zhou, Asymmetric N-H insertion reaction cooperatively catalyzed by rhodium and chiral spiro phosphoric acids. *Angew. Chem. Int. Ed.* **50**, 11483 (2011). [doi:10.1002/anie.201105485](https://doi.org/10.1002/anie.201105485)
23. S. E. Denmark, J. Fu, Catalytic enantioselective addition of allylic organometallic reagents to aldehydes and ketones. *Chem. Rev.* **103**, 2763 (2003). [doi:10.1021/cr020050h](https://doi.org/10.1021/cr020050h)
24. M. Yus, J. C. González-Gómez, F. Foubelo, Catalytic Enantioselective Allylation of Carbonyl Compounds and Imines. *Chem. Rev.* **111**, 7774 (2011). [doi:10.1021/cr1004474](https://doi.org/10.1021/cr1004474)
25. R. W. Hoffmann, W. Ladner, On the absolute stereochemistry of C-2 and C-3 in stegobinone. *Tetrahedron Lett.* **20**, 4653 (1979). [doi:10.1016/S0040-4039\(01\)86674-0](https://doi.org/10.1016/S0040-4039(01)86674-0)
26. H. C. Brown, K. S. Bhat, Enantiomeric Z- and E-crotyldiisopinocampheylboranes. Synthesis in high optical purity of all four possible stereoisomers of. beta.-methylhomoallyl alcohols. *J. Am. Chem. Soc.* **108**, 293 (1986). [doi:10.1021/ja00262a017](https://doi.org/10.1021/ja00262a017)
27. H. C. Brown, K. S. Bhat, Chiral synthesis via organoboranes. 7. Diastereoselective and enantioselective synthesis of erythro- and threo-.beta.-methylhomoallyl alcohols via enantiomeric (Z)- and (E)-crotylboranes. *J. Am. Chem. Soc.* **108**, 5919 (1986). [doi:10.1021/ja00279a042](https://doi.org/10.1021/ja00279a042)
28. H. Kim, S. Ho, J. L. Leighton, A more comprehensive and highly practical solution to enantioselective aldehyde crotylation. *J. Am. Chem. Soc.* **133**, 6517 (2011). [doi:10.1021/ja200712f](https://doi.org/10.1021/ja200712f)
29. A. Dobson, S. R. Robinson, M. F. Uttley, Complexes of the Platinum Metals. Part V Perfluorocarboxylato-derivatives. *J. Chem. Soc., Dalton Trans.* (5): 370 (1975). [doi:10.1039/dt9750000370](https://doi.org/10.1039/dt9750000370)



30. J. R. Zbieg, E. L. McInturff, J. C. Leung, M. J. Krische, Amplification of anti-diastereoselectivity via Curtin-Hammett effects in ruthenium-catalyzed hydrohydroxyalkylation of 1,1-disubstituted allenes: diastereoselectivity. *J. Am. Chem. Soc.* **133**, 1141 (2011). [doi:10.1021/ja1104156](https://doi.org/10.1021/ja1104156)
31. H. C. Maytum, B. Tavassoli, J. M. J. Williams, Reduction of aldehydes and ketones by transfer hydrogenation with 1,4-butanediol. *Org. Lett.* **9**, 4387 (2007). [doi:10.1021/ol702029n](https://doi.org/10.1021/ol702029n)
32. K. Hiraki, N. Ochi, Y. Sasada, H. Hayashida, Y. Fuchita, S. J. Yamanaka, Organoruthenium(II) Complexes formed by Insertion Reactions of Some Vinyl Compounds and Conjugated Dienes into a Hydrido-Ruthenium Bond. *Chem. Soc. Dalton Trans.* 873, 1985.
33. P. Xue *et al.*, Isomerism of [Ru( $\eta^3$ -allyl)Cl(CO)(PPh<sub>3</sub>)<sub>2</sub>]. *Organometallics* **23**, 4735 (2004). [doi:10.1021/om049646g](https://doi.org/10.1021/om049646g)
34. N. Ahmad *et al.*, Complexes of ruthenium, osmium, rhodium, and iridium containing hydride carbonyl, or nitrosyl ligands. *Inorg. Synth.* **15**, 45 (1974). [doi:10.1002/9780470132463.ch13](https://doi.org/10.1002/9780470132463.ch13)
35. W. C. Still, M. Kahn, A. Mitra, Rapid chromatographic technique for preparative separations with moderate resolution. *J. Org. Chem.* **43**, 2923 (1978). [doi:10.1021/jo00408a041](https://doi.org/10.1021/jo00408a041)
36. I. Kim, S. B. Han, M. J. Krische, *anti*-Diastereo- and enantioselective carbonyl crotylation from the alcohol or aldehyde oxidation level employing a cyclometallated iridium catalyst:  $\alpha$ -Methyl allyl acetate as a surrogate to preformed crotylmetal reagents. *J. Am. Chem. Soc.* **131**, 2514 (2009). [doi:10.1021/ja808857w](https://doi.org/10.1021/ja808857w)
37. X. Gao, I. Townsend, M. J. Krische, Enhanced *anti*-diastereo- and enantioselectivity in alcohol-mediated carbonyl crotylation using an isolable single component iridium catalyst. *J. Org. Chem.* **76**, 2350 (2011). [doi:10.1021/jo200068q](https://doi.org/10.1021/jo200068q)
38. A. V. Malkov, L. Dufková, L. Farrugia, P. Kocovsky, Quinox, a quinoline-type N-oxide, as organocatalyst in the asymmetric allylation of aromatic aldehydes with allyltrichlorosilanes: The role of arene–arene interactions. *Angew. Chem. Int. Ed.* **42**, 3674 (2003). [doi:10.1002/anie.200351737](https://doi.org/10.1002/anie.200351737)
39. J. D. Kim, I. S. Kim, C. H. Jin, O. P. Zee, Y. H. Jung, Regioselective and diastereoselective amination with use of chlorosulfonyl isocyanate: A short and efficient synthesis of (–)-cytoxazone. *Org. Lett.* **7**, 4025 (2005). [doi:10.1021/ol0515255](https://doi.org/10.1021/ol0515255)
40. S. E. Denmark, J. Fu, Catalytic, enantioselective addition of substituted allylic trichlorosilanes using a rationally-designed 2,2'-bispyrrolidine-based bisphosphoramidate. *J. Am. Chem. Soc.* **123**, 9488 (2001). [doi:10.1021/ja016552e](https://doi.org/10.1021/ja016552e)
41. Starting materials were made in accordance to the procedures in: S. Takizawa, A. Horii, H. Sasai, Acid–Base Organocatalysts for the Aza-Morita–Baylis–Hillman Reaction of Nitroalkenes. *Tetrahedron: Asymmetry* **21**, 891 (2010).
